# Supplementary material for: Azathioprine immunosuppression and disease modification in Parkinson’s disease (AZA-PD): a randomised double-blind placebo-controlled phase II trial protocol
Source: PubMed Central journal article supplement (PMC7684836; doi:10.1136/bmjopen-2020-040527), 2020-11-23
Supplement: bmjopen-2020-040527.draft_revisions.pdf [file bmjopen-2020-040527.draft_revisions.pdf]

# BMJ Open

BMJ Open is committed to open peer review. As part of this commitment we make the peer review history of every article we publish publicly available.

When an article is published we post the peer reviewers' comments and the authors' responses online. We also post the versions of the paper that were used during peer review. These are the versions that the peer review comments apply to.

The versions of the paper that follow are the versions that were submitted during the peer review process. They are not the versions of record or the final published versions. They should not be cited or distributed as the published version of this manuscript.

BMJ Open is an open access journal and the full, final, typeset and author-corrected version of record of the manuscript is available on our site with no access controls, subscription charges or pay-per-view fees (<http://bmjopen.bmj.com>).

If you have any questions on BMJ Open's open peer review process please email [info.bmjopen@bmj.com](mailto:info.bmjopen@bmj.com)

# BMJ Open

## Azathioprine immunosuppression and disease modification in Parkinson's disease (AZA-PD): a randomised double-blind placebo-controlled phase II trial protocol

|                               |                                                                                                                                                                                                                                                                                                                                                                                                                                                                               |
|-------------------------------|-------------------------------------------------------------------------------------------------------------------------------------------------------------------------------------------------------------------------------------------------------------------------------------------------------------------------------------------------------------------------------------------------------------------------------------------------------------------------------|
| Journal:                      | <i>BMJ Open</i>                                                                                                                                                                                                                                                                                                                                                                                                                                                               |
| Manuscript ID                 | bmjopen-2020-040527                                                                                                                                                                                                                                                                                                                                                                                                                                                           |
| Article Type:                 | Protocol                                                                                                                                                                                                                                                                                                                                                                                                                                                                      |
| Date Submitted by the Author: | 15-May-2020                                                                                                                                                                                                                                                                                                                                                                                                                                                                   |
| Complete List of Authors:     | Greenland, Julia; University of Cambridge, Department of Clinical Neurosciences<br>Cutting, Emma; University of Cambridge, Department of Clinical Neurosciences; Cambridge Clinical Trials Unit<br>Kadyan, Sonakshi; Cambridge Clinical Trials Unit<br>Bond, Simon; Cambridge Clinical Trials Unit<br>Chhabra, Anita; Cambridge University Hospitals NHS Foundation Trust, Pharmacy<br>Williams-Gray, Caroline; University of Cambridge, Department of Clinical Neurosciences |
| Keywords:                     | Parkinson-s disease < NEUROLOGY, THERAPEUTICS, IMMUNOLOGY                                                                                                                                                                                                                                                                                                                                                                                                                     |
|                               |                                                                                                                                                                                                                                                                                                                                                                                                                                                                               |

SCHOLARONE™  
Manuscripts

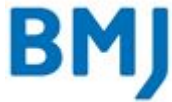

I, the Submitting Author has the right to grant and does grant on behalf of all authors of the Work (as defined in the below author licence), an exclusive licence and/or a non-exclusive licence for contributions from authors who are: i) UK Crown employees; ii) where BMJ has agreed a CC-BY licence shall apply, and/or iii) in accordance with the terms applicable for US Federal Government officers or employees acting as part of their official duties; on a worldwide, perpetual, irrevocable, royalty-free basis to BMJ Publishing Group Ltd ("BMJ") its licensees and where the relevant Journal is co-owned by BMJ to the co-owners of the Journal, to publish the Work in this journal and any other BMJ products and to exploit all rights, as set out in our [licence](#).

The Submitting Author accepts and understands that any supply made under these terms is made by BMJ to the Submitting Author unless you are acting as an employee on behalf of your employer or a postgraduate student of an affiliated institution which is paying any applicable article publishing charge ("APC") for Open Access articles. Where the Submitting Author wishes to make the Work available on an Open Access basis (and intends to pay the relevant APC), the terms of reuse of such Open Access shall be governed by a Creative Commons licence – details of these licences and which [Creative Commons](#) licence will apply to this Work are set out in our licence referred to above.

Other than as permitted in any relevant BMJ Author's Self Archiving Policies, I confirm this Work has not been accepted for publication elsewhere, is not being considered for publication elsewhere and does not duplicate material already published. I confirm all authors consent to publication of this Work and authorise the granting of this licence.

## Title

Azathioprine immunosuppression and disease modification in Parkinson's disease (AZA-PD): a randomised double-blind placebo-controlled phase II trial protocol

## Authors

Julia C. Greenland<sup>1</sup>, Emma Cutting<sup>1,2</sup>, Sonakshi Kadyan<sup>2</sup>, Simon Bond<sup>2</sup>, Anita Chhabra<sup>3</sup>, Caroline H. Williams-Gray<sup>1</sup>

<sup>1</sup>Department of Clinical Neurosciences, John van Geest Centre for Brain Repair, University of Cambridge, Cambridge, UK.

<sup>2</sup>Cambridge Clinical Trials Unit, Cambridge University Hospitals NHS Foundation Trust, Cambridge

<sup>3</sup> Pharmacy, Cambridge University Hospitals NHS Foundation Trust, Cambridge

## Corresponding author

Julia Greenland

John van Geest Centre for Brain Repair, Department of Clinical Neurosciences, University of Cambridge, Forvie Site, Cambridge CB2 0PY, United Kingdom.

Tel: +44 1223 331160

Fax: +44 1223 331174

[Jcg69@cam.ac.uk](mailto:Jcg69@cam.ac.uk)

## Keywords

Parkinson's disease, immune system, immunosuppression, clinical trial, therapy

## Word Count

3951

1  
2  
3  
4  
5  
6  
7  
8  
9  
10  
11  
12  
13  
14  
15  
16  
17  
18  
19  
20  
21  
22  
23  
24  
25  
26  
27  
28  
29  
30  
31  
32  
33  
34  
35  
36  
37  
38  
39  
40  
41  
42  
43  
44  
45  
46  
47  
48  
49  
50  
51  
52  
53  
54  
55  
56  
57  
58  
59  
60

For peer review only

## Abstract

### *Introduction*

The immune system is implicated in the aetiology and progression of Parkinson's disease (PD). Inflammation and immune activation occur both in the brain and in the periphery, and a pro-inflammatory cytokine profile is associated with more rapid clinical progression. Furthermore, the risk of developing PD is related to genetic variation in immune-related genes, and reduced by the use of immunosuppressant medication. We are therefore conducting a 'proof of concept' trial of azathioprine, an immunosuppressant medication, to investigate whether suppressing the peripheral immune system has a disease-modifying effect in PD.

### *Methods and analysis*

AZA-PD is a phase II randomised placebo-controlled double-blind trial in early PD. Sixty participants, with clinical markers indicating an elevated risk of disease progression and no inflammatory or immune comorbidity, will be treated (azathioprine: placebo, 1:1) for 12 months, with a further 6-months follow-up. The primary outcome is the change in the MDS-UPDRS gait/axial score in the OFF state over the 12-month treatment period. Exploratory outcomes include additional measures of motor and cognitive function, non-motor symptoms and quality of life. In addition, peripheral and central immune markers will be investigated through analysis of blood, cerebrospinal fluid and PK-11195 PET imaging.

### *Ethics and dissemination*

The study was approved by the London-Westminster research ethics committee (reference 19/LO/1705) and has been accepted by the MHRA for a clinical trials authorisation (reference CTA 12854/0248/001-0001). In addition, approval has been granted from the Administration of Radioactive Substances Advisory Committee (ARSAC). The results of this trial will be disseminated

1  
2  
3 through publication in scientific journals and presentation at national and international conferences  
4  
5 and a lay summary will be available on our website.  
6  
7

8  
9 *Trial Registration*

10  
11 ISRCTN14616801, 14/5/2020. EudraCT- 2018-003089-14  
12  
13

14 Protocol version 1.1: AZA-PD CCTU0218  
15  
16  
17  
18  
19

20  
21 **Strengths and limitations of this study**  
22

- 23 • First clinical trial of a peripherally acting immunosuppressive drug in Parkinson's disease
- 24 • Robust, randomised double-blind placebo-controlled design
- 25 • Novel patient stratification approach with recruitment of a more rapidly progressing
- 26 subgroup to optimise chance of demonstrating clinical effect
- 27
- 28 • Detailed exploratory measures examining peripheral and central immune profile in PD to
- 29 demonstrate proof of mechanism
- 30
- 31 • As a single centre 'proof of concept' trial, sample size is limited to 60 participants.  
32  
33  
34  
35  
36  
37  
38  
39  
40  
41  
42  
43  
44  
45  
46  
47  
48  
49  
50  
51  
52  
53  
54  
55  
56  
57  
58  
59  
60

## INTRODUCTION

Parkinson's disease (PD) is a common neurodegenerative disorder diagnosed clinically by key motor features. The core pathology in PD involves the loss of dopaminergic neurons in the substantia nigra (SN) with intracellular accumulation of alpha-synuclein aggregates (Lewy bodies). Dopamine replacement therapy can control some of the motor symptoms. However, other problems including impaired balance and cognitive dysfunction are due to more widespread neurodegenerative pathology and are consequently unresponsive to dopaminergic therapies. These symptoms progress such that by 10 years from diagnosis, around two thirds of patients have balance and walking difficulties, and around half have dementia,[1] with a profound impact on quality of life [2, 3] and care requirements.[4] There are currently no treatments to alter disease course and prevent these devastating complications, hence there is an urgent need to find effective disease-modifying therapies for PD. There is increasing evidence that the immune system plays an important role in driving neurodegeneration in PD, and we propose that targeting the immune system may be an effective strategy for slowing disease progression.

The link between genetic variation in immune pathways and risk of Parkinson's disease is well-established. Risk of developing PD is associated with polymorphisms in the Human Leucocyte Antigen (HLA) region, which encodes proteins vital to antigen recognition and presentation.[5, 6] Large scale analyses of Genome Wide Association Study (GWAS) data also implicate the immune system in PD, demonstrating heritability enrichment for genes of the adaptive immune system, including those involved in lymphocyte regulation and cytokine signalling pathways.[7, 8] Further evidence of an immune contribution to PD risk comes from epidemiological studies: individuals who regularly take non-steroidal anti-inflammatory drugs (NSAIDs) have reduced risk of developing PD [9, 10], as do those on immunosuppressive therapy.[11] There is also evidence that immune activation impacts on disease progression rate. In a large incident PD cohort, a pro-inflammatory serum cytokine profile at baseline



1  
2  
3 was associated with faster motor progression and impaired cognition over 36 months of follow-  
4  
5 up.[12]  
6

7  
8 Activation of microglia, the inflammatory cells of the brain, has been clearly demonstrated in PD  
9  
10 patients both at post-mortem [13-16] and using [<sup>11</sup>C]-PK11195 positron emission tomography (PET)  
11  
12 imaging in-vivo.[17-19] These cells have a role in responding to tissue injury, regulating the cerebral  
13  
14 microenvironment, and antigen presentation.[20] It is thought that this activation is driven by toxic  
15  
16 misfolded or post-translationally modified forms of alpha-synuclein released by degenerating cells,  
17  
18 leading to secretion of proinflammatory and neurotoxic molecules, resulting in a cyclical process of  
19  
20 cell damage.[21]  
21  
22

23  
24 Abnormalities in the peripheral immune profile in PD are also well demonstrated and include  
25  
26 alterations in both the innate and adaptive immune compartments. There is a shift towards 'classical'  
27  
28 (inflammatory) monocytes with elevated expression of activation markers,[22] particularly in patients  
29  
30 at higher dementia risk.[23] In the T lymphocyte compartment, several authors have reported bias  
31  
32 towards pro-inflammatory CD4+ lymphocyte subsets and production of pro-inflammatory  
33  
34 cytokines.[24-27] There may also be a reduction in the number and function of CD4+ T-regulatory  
35  
36 (Treg) cells, whose role is to counter this pro-inflammatory response.[24, 26] In addition, changes in  
37  
38 the CD8 compartment have been reported, with increased expression of activation markers and  
39  
40 reduced markers of age-related senescence.[28]  
41  
42  
43

44  
45 Importantly, T-cells with specificity for epitopes of alpha-synuclein have been identified and reported  
46  
47 to occur at higher frequency in PD than controls; furthermore their frequency was closely associated  
48  
49 with possession of known PD risk alleles at the HLA locus[29], thus suggesting that alpha-synuclein  
50  
51 may drive a peripheral adaptive immune response as well as an innate response of microglia in the  
52  
53 brain. Elevated levels of alpha-synuclein specific antibodies are also present in the early stages of  
54  
55 PD.[30] Peripheral immune cells may contribute to brain inflammation and neurotoxicity by trafficking  
56  
57 into the central nervous system in PD. CD4+ and CD8+ lymphocytes have been shown to be present  
58  
59  
60

1  
2  
3 in increased numbers in the SN at post-mortem in PD patients,[16, 25] as well as in ex-vivo  
4 cerebrospinal fluid (CSF) samples.[31] The precise mechanism by which peripheral immune cells drive  
5 neuronal damage in PD is still unclear, but it has recently been demonstrated that Th17 cells from PD  
6 patients drive cell death in autologous iPSC-derived dopaminergic midbrain neurons.[25]  
7  
8  
9

10  
11  
12 Immune manipulation in animal models of PD alters disease susceptibility and severity. Using an MPTP  
13 mouse model of PD, studies have demonstrated that a lack of CD4+ lymphocytes attenuates  
14 dopaminergic cell death,[16] as does administration of Treg cells.[32] In mice that over-express alpha-  
15 synuclein, knockout of MHCII prevents both microglial activation and dopaminergic  
16 neurodegeneration.[33] Furthermore, cyclosporin, a widely used immunosuppressant, is effective in  
17 improving motor and cognitive deficits in multiple mouse models of PD.[34]  
18  
19  
20  
21  
22  
23  
24  
25

26  
27 Although animal models of PD indicate that immunomodulatory therapies may have efficacy in  
28 protecting against neurodegeneration, there is limited clinical trial data in PD to date. Phase II trials of  
29 minocycline and pioglitazone, agents which reduce microglial activation in the brain in animal models,  
30 have been negative.[35-37] An early phase trial of sargramostim, a human recombinant granulocyte-  
31 macrophage colony-stimulating factor which promotes differentiation of pro-inflammatory T-effector  
32 cells into Treg cells has reported a modest improvement in an exploratory outcome of motor function  
33 over 8-weeks treatment.[38]  
34  
35  
36  
37  
38  
39  
40  
41  
42

43 We propose that direct suppression of the peripheral immune system is an alternative, highly relevant  
44 therapeutic strategy which has not been tested in clinical trials to date. Azathioprine is an  
45 immunosuppressant drug widely used in clinical practice for a range of immune-related conditions. It  
46 is a purine analogue which inhibits nucleic acid synthesis, hence reducing proliferation of lymphocytes  
47 involved in targeting and amplification of the immune response. It affects both the cell-mediated and  
48 antibody-mediated responses through reducing T and B lymphocyte proliferation.[39] It was selected  
49 over other immunosuppressants because of its established efficacy in a range of clinical conditions,  
50 including central nervous system disorders such as multiple sclerosis,[40] and its acceptable safety  
51  
52  
53  
54  
55  
56  
57  
58  
59  
60

1  
2  
3 profile with recognised protocols for toxicity monitoring. Furthermore, it is generally well tolerated in  
4  
5 the elderly and is a once-daily preparation for ease of administration.  
6  
7

## 8 9 METHODS AND ANALYSIS

### 10 11 12 Overview

13  
14  
15 AZA-PD is a randomised double-blind placebo-controlled trial of azathioprine in early Parkinson's  
16  
17 disease which aims to provide 'proof of concept' that a peripherally acting immunosuppressive drug  
18  
19 can slow clinical disease progression. The trial will investigate whether the drug has an effect on  
20  
21 disease course over 12 months of treatment and whether this is maintained over 6 months of  
22  
23 subsequent follow-up. Sixty participants will be recruited and randomised 1:1 to receive active  
24  
25 treatment or placebo. Clinical assessments will be performed at baseline, 6 months, 12 months and  
26  
27 18 months (6 months post completion of treatment), with rigorous safety monitoring. In addition, the  
28  
29 trial aims to demonstrate 'proof of mechanism' by evaluating the impact of azathioprine on blood,  
30  
31 CSF and neuroimaging parameters of immune activation in the trial population and determining the  
32  
33 relationship between these parameters and clinical measures of disease progression.  
34  
35  
36

37  
38 The trial timeline is summarised in **Error! Reference source not found..**  
39  
40

41  
42 Although AZA-PD is open to recruitment, given the current COVID-19 pandemic, recruitment has not  
43  
44 commenced due to safety concerns. The Trial Steering Committee (TSC) and Data and Safety  
45  
46 Monitoring Board (DSMB) will decide on an appropriate date to begin recruitment in due course, and  
47  
48 protocol amendments to maximise patient safety will be submitted to the appropriate bodies when  
49  
50 the best course of action has been determined.  
51  
52  
53  
54  
55  
56  
57  
58  
59  
60

## Patient and public involvement (PPI)

PD patients and their partners and carers who attend our research clinic at the John van Geest Centre for Brain Repair (VGB), University of Cambridge gave input into the protocol design. A PPI advisory panel of 4 patients/carers reviewed the protocol and provided specific feedback, leading to the addition of optional components. The PPI panel also reviewed our participant information sheet for clarity.

## Participant Identification

Participants will be recruited from a single site in Cambridge, UK. Potential participants will be identified from the PD Research clinic database at the VGB. These individuals have undergone detailed clinical phenotyping, and information on demographics, comorbidities and medication is available. They have consented to be contacted about other research studies. Potential participants will be pre-selected by cross-referencing existing data with the inclusion/exclusion criteria outlined in **Error! Reference source not found.** A key component of this process involves the calculation of a prognostic risk score, based on a model we have previously developed and validated, using age, MDS-UPDRS axial score and semantic fluency to estimate risk of a poor prognosis (dementia, postural instability or death) within 5 years.[41] Only patients with a risk greater than 50% will be invited to take part. This strategy has been adopted to maximise the probability of demonstrating significant slowing of clinical progression with azathioprine treatment.

Potential participants will be sent a copy of the participant information sheet, and telephoned after two weeks to determine whether they are interested in participating. If so, they will attend a screening visit, where written informed consent will be obtained before confirming eligibility.

## Eligibility criteria

A potential participant will be deemed eligible for recruitment into AZA-PD if they meet the inclusion and exclusion criteria listed in **Error! Reference source not found.** A review of medical history and blood tests will be used to determine eligibility.

## Outcome measures

The primary outcome measure is change in MDS-UPDRS gait/axial score in the OFF state over the 12-month treatment period. This is a clinical measure which has been shown to be the most sensitive measure of motor progression in PD, is relatively resistant to dopaminergic therapy and has an important impact on quality of life.[42] This score is a sum of the points from the following sections of MDS-UPDRS part III:

- 3.1 – speech
- 3.2 – facial expression
- 3.9 – rising from a chair
- 3.10 – gait
- 3.12 – postural stability
- 3.13 – posture
- 3.14 – body bradykinesia

Other outcome measures are exploratory and include:

- change in MDS-UPDRS gait/axial score in OFF state at 18 months
- change in total MDS-UPDRS in OFF state at 12 and 18 months
- change in electromagnetic sensor (EMS) measurements whilst performing MDS-UPDRS tremor and bradykinesia assessments at 12 and 18 months

- proportion of patients developing postural instability (Hoehn and Yahr stage 3 or greater) at 12 and 18 months
- change in global cognition (ACE-III) at 12 and 18 months
- change in patient reported outcome measure of quality of life (PDQ-39) at 12 and 18 months
- change in NMSS at 12 and 18 months
- change in dose of symptomatic dopaminergic therapy (LEDD) at 12 and 18 months
- the safety and tolerability of azathioprine assessed by the number of adverse events (AEs) recorded during the 12-month treatment period
- change in [<sup>11</sup>C]-PK11195 PET non- dissociable binding potential (BP<sub>ND</sub>) in subcortical and cortical regions of interest at 12 months
- change in total lymphocyte count at 6, 12 and 18 months
- change in serum immunoglobulin levels at 6, 12 and 18 months
- change in levels of serum and CSF cytokine levels at 12 and 18 months
- change in lymphocyte subsets in blood and CSF at 12 and 18 months

### Sample Size Calculation

The treatment effect size is unknown and therefore cannot be used to inform sample size calculations. A sample size of 60 has been selected pragmatically based on feasibility of recruitment.

However, longitudinal clinical data from the ICICLE-PD cohort study provides some idea of an anticipated effect size for the primary outcome measure. ICICLE-PD patients were stratified by cytokine profile. Those with a 'pro-inflammatory' profile (n=32) had a more rapid symptom progression, with mean (SD) annualised change in MDS-UPDRS gait/axial score of 1.95 (1.92). In the subgroup with an 'anti-inflammatory' cytokine profile (n=26), mean (SD) annualised change in MDS-

1  
2  
3 UPDRS gait/axial score was 0.72 (1.40).[12] The corresponding between group difference of 1.2  
4  
5 points is equivalent to a standardised effect size (Cohen's d) of 0.73. The magnitude this effect,  
6  
7 which equates to a 4% change on the 28-point gait-axial MDS-UPDRS subscale, would be clinically  
8  
9 significant. For comparison, the estimated minimum clinically important change on the full 132-point  
10  
11 MDS-UPDRS motor scale is  $\approx$ 2% (2.5 points).[43] Furthermore, the axial-gait items of the MDS-UPDRS  
12  
13 are those with the greatest impact on quality of life.[42]  
14  
15

16  
17 As this is an early-phase proof of concept trial, it is important to maximise the chances of continuing  
18  
19 development if the treatment is genuinely effective, and thus a significance level of 25% under a 1-  
20  
21 sided test will be used. If the treatment effect is a 2% change (0.37 standardised effect), the design  
22  
23 has 78% power, and for a 4% change (0.73 standardised effect), the design has 99% power.  
24  
25  
26  
27  
28  
29

## 30 Trial procedures

### 31 Clinical

32  
33  
34  
35  
36 Clinical measures assessing both motor and non-motor components of PD will be performed at  
37  
38 baseline, mid-treatment, end-of-treatment and after 6-months further follow-up (see **Error!**  
39  
40 **Reference source not found.**). Throughout the course of the trial participants will continue to take  
41  
42 their PD medication as prescribed by their treating physician, and dose adjustments are permitted.  
43  
44 However, some assessments will be conducted 'OFF' medication.  
45  
46  
47

48  
49 The Movement Disorder Society-Unified Parkinson's Disease Rating Scale (MDS-UPDRS) is widely  
50  
51 used to quantify PD severity and includes questionnaires assessing the non-motor and motor  
52  
53 aspects of the disease, a motor examination performed by a clinician and an assessment of motor  
54  
55 complications (dyskinesias and fluctuations).[44] The MDS-UPDRS part III will be assessed in the OFF  
56  
57 state; in the absence of regular dopaminergic medication. The aim of this is to expose underlying  
58  
59 disease severity and avoid confounding effects from variability in medication doses or timing. This  
60

1  
2  
3 examination will be filmed to enable subsequent rating by an independent assessor to check inter-  
4  
5 rater reliability. Our primary outcome measure is derived from the MDS-UPDRS: the gait-axial sub-  
6  
7 score, as previously discussed. Two sections of the MDS-UPDRS part III (tremor and bradykinesia)  
8  
9 will be repeated whilst the participant is wearing an electromagnetic sensor (EMS, Polhemus Inc.) on  
10  
11 the index finger and thumb, which will give an objective measure of the participant's movements.  
12  
13 Motor stage will also be evaluated using the Hoehn and Yahr scale, a 5-point scale used to capture  
14  
15 the stages of progression of PD, with stage 3 representing the development of postural  
16  
17 instability.[45]

18  
19  
20  
21 Cognition will be assessed using the Addenbrooke's Cognitive Examination-III (ACE-III). This provides  
22  
23 a global measure of cognition as well as sub-scores in 5 domains; attention, memory, fluency,  
24  
25 language and visuospatial function.[46] Other non-motor aspects of PD will be evaluated using the  
26  
27 short form 15-item Geriatric Depression Scale (GDS), a questionnaire assessing depressive symptoms  
28  
29 filled in by the participant,[47] and the Parkinson's disease Non-Motor Symptom Scale (NMSS),  
30  
31 completed by the trial assessor.[48] Finally, we will use the Parkinson's Disease Questionnaire 39  
32  
33 (PDQ-39), a self-rated questionnaire measuring PD-related quality of life.[49]

34  
35  
36  
37  
38  
39 Dopaminergic medication requirement will be monitored throughout the trial, and standardised by  
40  
41 calculating Levodopa Equivalent Daily Dose (LEDD), which allows quantification of different doses and  
42  
43 types of Parkinson's medication on a single scale.[50]

#### 44 45 46 47 48 49 PK-11195 PET imaging

50  
51  
52 [<sup>11</sup>C]-PK11195 PET will be used to measure activated microglia in the brain.[17, 18] Scanning will be  
53  
54 conducted at the Wolfson Brain Imaging Centre (WBIC) on a GE SIGNA PET/MRI scanner, with the  
55  
56 radiotracer produced at the WBIC Radiopharmaceutical Chemistry laboratory. MRI will be used for  
57  
58 co-localisation. 500 MBq of the [<sup>11</sup>C]-PK11195 radiotracer will be injected via a peripheral venous  
59  
60



1  
2  
3 cannula over 30 seconds and PET emission data will be acquired for 75 min post-injection in 55 time  
4  
5 frames. Following image reconstruction and attenuation correction, specific tracer binding will be  
6  
7 analysed with the simplified reference tissue model (SRTM; [51]) to quantify binding potential  
8  
9 relative to a non-displaceable compartment (BPND). The reference region will be estimated with  
10  
11 supervised cluster analysis for [<sup>11</sup>C]PK11195 from existing scans in healthy controls acquired on the  
12  
13 same scanner. BPND will be compared pre and post treatment using a region of interest approach.  
14  
15

16  
17 Given that some participants may have difficulty tolerating prolonged PET imaging, this will be  
18  
19 optional. It will be performed between screening and baseline, and repeated within 3 months  
20  
21 following the end of treatment.  
22  
23

#### 24 25 Biosample collection and processing

26  
27 14 mls of blood will be collected in serum tubes at baseline, mid-treatment, end-of-treatment and  
28  
29 follow-up visits for analysis of inflammatory cytokines, CRP and immunoglobulins. Tubes will be  
30  
31 centrifuged at 2000RPM (600G) for 15 mins following 15 minutes clotting time for extraction of  
32  
33 serum. Aliquots will be stored at -80°C for subsequent batch analysis using ELISA and  
34  
35 electrochemiluminescence assays.  
36  
37

38  
39 At baseline, end-of-treatment and follow-up visits an additional 27mls of blood will be collected in  
40  
41 lithium heparin tubes for separation of peripheral blood mononuclear cells (PBMCs) for  
42  
43 immunophenotyping. A concurrent full blood count (FBC) will be performed from an EDTA sample  
44  
45 (2.6mls).  
46  
47

48  
49 CSF will be collected via lumbar puncture before the baseline visit and at the treatment endpoint.  
50  
51 This is an optional component of the study in order to ensure that its inclusion does not limit  
52  
53 recruitment. CSF will be spun at 400G for 10 minutes for extraction of immune cells for  
54  
55 contemporaneous immunophenotyping alongside PBMC analysis. Supernatants will be stored at -  
56  
57 80°C for later batch analysis of relevant immune and protein markers. Immunophenotyping will be  
58  
59  
60

1  
2  
3 performed for subsets of T cells, B cells and monocytes using flow cytometry, run within 24 hours of  
4  
5 sample collection.  
6  
7  
8  
9  
10  
11  
12  
13  
14  
15  
16  
17  
18  
19  
20  
21  
22  
23  
24  
25  
26  
27  
28  
29  
30  
31  
32  
33  
34  
35  
36  
37  
38  
39  
40  
41  
42  
43  
44  
45  
46  
47  
48  
49  
50  
51  
52  
53  
54  
55  
56  
57  
58  
59  
60

For peer review only

1  
2  
3  
4  
5  
6  
7  
8  
9  
10  
11  
12  
13  
14  
15  
16  
17  
18  
19  
20  
21  
22  
23  
24  
25  
26  
27  
28  
29  
30  
31  
32  
33  
34  
35  
36  
37  
38  
39  
40  
41  
42  
43  
44  
45  
46

Table 1: Schedule of Assessments

|                      | Screening Visit               | Imaging Visit    | CSF Collection  | Baseline Visit | Monitoring Visits <sup>1</sup> | Dose escalation Visit | Mid-Treatment Visit | End of Treatment Visit | Imaging Visit | Follow-up Visit |
|----------------------|-------------------------------|------------------|-----------------|----------------|--------------------------------|-----------------------|---------------------|------------------------|---------------|-----------------|
|                      | Day -42 (max)                 | Approx. Day -14± | Approx. Day -7± | Day 0± 14      | Day 14 ± 5 and onwards         | Day 28± 5             | Day 182± 14         | Day 365± 14            | Day 410± 45   | Day 547±14      |
|                      | Informed written consent      | ✓                |                 |                |                                |                       |                     |                        |               |                 |
|                      | Eligibility review            | ✓                |                 |                |                                |                       |                     |                        |               |                 |
|                      | Randomisation                 |                  |                 | ✓              |                                |                       |                     |                        |               |                 |
|                      | Vital Signs                   |                  |                 | ✓              | ✓                              | ✓                     | ✓                   | ✓                      |               | ✓               |
|                      | Weight in kg                  | ✓                |                 | ✓              | ✓                              | ✓                     | ✓                   |                        |               |                 |
| Clinical Assessments | Demographics                  |                  |                 | ✓              |                                |                       |                     |                        |               |                 |
|                      | Medical history               | ✓                |                 | ✓              | ✓                              | ✓                     | ✓                   | ✓                      |               | ✓               |
|                      | Concomitant medication review | ✓                |                 | ✓              | ✓                              | ✓                     | ✓                   | ✓                      |               | ✓               |
|                      | MDS-UPDRS                     |                  |                 | ✓              |                                |                       | ✓                   | ✓                      |               | ✓               |
|                      | NART                          |                  |                 | ✓              |                                |                       |                     |                        |               |                 |
|                      | ACE III                       |                  |                 | ✓              |                                |                       | ✓                   | ✓                      |               | ✓               |
|                      | GDS                           |                  |                 | ✓              |                                |                       | ✓                   | ✓                      |               | ✓               |
|                      | NMSS                          |                  |                 | ✓              |                                |                       | ✓                   | ✓                      |               | ✓               |
|                      | PDQ-39                        |                  |                 | ✓              |                                |                       | ✓                   | ✓                      |               | ✓               |
|                      | Adverse events review         | ✓                | ✓               | ✓              | ✓                              | ✓                     | ✓                   | ✓                      | ✓             | ✓               |
| IMP compliance check |                               |                  |                 |                | ✓                              | ✓                     | ✓                   | ✓                      |               |                 |

|                  |                                                                 |   |   |   |   |   |   |   |   |   |
|------------------|-----------------------------------------------------------------|---|---|---|---|---|---|---|---|---|
| Imaging-Optional | [11C]-PK11195 PET-MRI                                           |   | ✓ |   |   |   |   |   | ✓ |   |
| Blood tests      | Screening bloods <sup>2</sup>                                   | ✓ |   |   |   |   |   |   |   |   |
|                  | Safety monitoring bloods <sup>3</sup>                           |   |   |   | ✓ | ✓ | ✓ | ✓ |   | ✓ |
|                  | CRP, immunoglobulins and serum storage for cytokine measurement |   |   | ✓ |   |   | ✓ | ✓ |   | ✓ |
|                  | Immunophenotyping                                               |   |   | ✓ |   |   |   | ✓ |   | ✓ |
| CSF-optional     | Immune markers and immunophenotyping                            |   |   | ✓ |   |   |   | ✓ |   |   |

<sup>1</sup> Monitoring visits will take place at: day 14, day 42, day 56, day 70, day 98, day 252 and day 547 (as part of the routine follow-up visit). Additional monitoring visits may also be scheduled if there are patient safety concerns.

<sup>2</sup>Screening bloods include FBC, U&Es, LFTs, coagulation, TPMT, HIV, Syphilis, HepB, HepC, EBV serology, VZV serology, LH and FSH (if female and reproductive age)

<sup>3</sup>Monitoring bloods include FBC, U&Es, LFTs

### Treatment allocation, blinding and safety monitoring

Participants will be randomised 1:1 to receive azathioprine or placebo using Sealed Envelope, an online randomisation system. Clinical assessors and participants will be blinded to treatment allocation. Balanced assignment of each treatment will be achieved using permuted block randomisation, which will be stratified for: age  $\leq 71$  vs  $> 71$ , and MDS-UPDRS-III  $\leq 30$  vs  $> 30$ .

Treatment will be commenced at a dose of 1mg/kg, based on 25mg tablets of IMP (azathioprine/placebo). In addition to the visits shown in *Figure 1*, treatment monitoring visits will be conducted to screen for potential complications associated with azathioprine. These will include blood tests to screen for myelosuppression, liver or renal dysfunction, adverse events reporting and assessment of treatment compliance (review of patient-completed dosing diary and counting of IMP at regular intervals). Initially, monitoring visits will occur 2 weekly, and after 4 weeks, the azathioprine dose will be increased to 2mg/kg (assuming blood tests and clinical assessments are satisfactory), the standard therapeutic dose used in clinical practice. There will be a matched doubling of the placebo dose to maintain blinding. Once the participant is stable on their dose, treatment monitoring will be carried out less frequently (see monitoring protocol, *Figure 3*).

Given that azathioprine will produce changes in FBC parameters, the blinded trial team conducting patient assessments and laboratory analysis will not have access to monitoring blood results throughout the duration of the trial. The blood tests will be reviewed by a separate unblinded team of clinicians, who will make decisions on dose changes when necessary. If a dose reduction is required, the participant will have an additional 3 monitoring visits at 2-weekly intervals to ensure stability of blood tests. Dose reductions and, where necessary, withdrawal of treatment will be carried out based on pre-defined clinical and laboratory criteria to ensure the safety of participants, including the development of significant myelosuppression, intolerable gastrointestinal side effects and hypersensitivity reactions. Participants who have been withdrawn from treatment will be encouraged to continue to attend the remainder of the trial assessments.

1  
2  
3 To ensure blinding is maintained amongst clinical assessors and participants, dose adjustments and  
4 treatment withdrawals will be also made for some participants in the placebo arm, with additional  
5 monitoring visits. Matched pairs of placebo and azathioprine-treated participants will be generated  
6  
7 to facilitate this, and all dose adjustment decisions will be made by the unblinded team.  
8  
9

10  
11  
12 Emergency unblinding will be carried out in the event of a valid medical or safety reason, where the  
13 clinical care of the participant will be facilitated by the knowledge of whether they have been taking  
14  
15 azathioprine, as decided by the treating clinician. It will be executed using Sealed Envelope, and  
16  
17 where possible the trial team will remain blinded.  
18  
19

20  
21  
22 Following the end of the trial, and for participants who withdraw early, we will offer continuing  
23  
24 follow-up through our research clinic at the VGB.  
25  
26

### 27 28 29 30 31 **Trial monitoring and oversight**

32  
33 Safety monitoring will be overseen by a DSMB who will have access to interim recruitment and safety  
34  
35 data. The DSMB will report to the TSC should it become clear that one treatment allocation is either  
36  
37 indicated or contraindicated, or apparent that no clear outcome can be obtained from the trial. The  
38  
39 TSC, who are independent from the Sponsor, will provide overall supervision of the trial and ensure  
40  
41 that it meets appropriate standards. These groups include clinicians with experience in PD or  
42  
43 immunosuppression, independent statisticians, and the TSC includes a lay member.  
44  
45  
46

47  
48  
49 AZA-PD is jointly sponsored by Cambridge University Hospitals NHS Foundation Trust and the  
50  
51 University of Cambridge. The Sponsor will review all trial documentation, including any proposed  
52  
53 amendments, prior to submission to the relevant regulatory bodies, which can only be completed  
54  
55 once the Sponsor has approved the changes. Changes will then be communicated to participants,  
56  
57 the DMSB, TSC, and trial registries.  
58  
59  
60

1  
2  
3  
4  
5 Adherence to the protocol and regulatory requirements will be reviewed by a Clinical Trials Monitor,  
6  
7 assigned by the Sponsor. The first monitoring visit will occur within 10 days of the first randomisation,  
8  
9 with frequency thereafter determined by a risk assessment which will be reviewed and adjusted as  
10  
11 necessary throughout the course of the trial.  
12  
13  
14  
15  
16

## 17 **Data Analysis**

18  
19  
20 Trial data will be transferred from paper CRFs to the electronic trial database, where it will be  
21  
22 anonymised, but with preserved linkage records. Patient-identifiable data (PID), will be stored on a  
23  
24 password-protected database within the SDHS hosted by the University of Cambridge, with access  
25  
26 granted only to relevant members of the trial team. PID will be kept for 5 years following the end of  
27  
28 the trial, as per regulatory requirements. Participant consent will be specifically sought for  
29  
30 data/sample sharing with our collaborators, and use of remaining biological samples in future  
31  
32 ethically-approved research.  
33  
34  
35

36 Data will be analysed on an “intention to treat” basis, with further “per protocol” analysis in  
37  
38 participants with at least 80% compliance with trial medication. All endpoints will be summarised and  
39  
40 broken down by treatment group and time point, where relevant. Mean, median, standard deviation,  
41  
42 minimum/maximum will be used for continuous endpoints, and frequency tables for categorical or  
43  
44 binary endpoints. Equivalent box and whisker plots or stacked bar charts will be produced for  
45  
46 continuous and categorical endpoints respectively.  
47  
48  
49

50 The primary analysis will estimate the difference between treatment groups in terms of the primary  
51  
52 endpoint. An analysis of covariance (ANCOVA) model will be fitted adjusting for baseline MDS-UPDRS  
53  
54 gait/axial score, gender, LEDD, and age. Treatment effect estimates, standard errors, confidence  
55  
56 intervals (95% and 40% levels) and 1-sided p-values will be provided. A 1-sided p-value less than 25%  
57  
58 will be regarded as statistically significant. Similar comparative analyses will be produced for other  
59  
60

1  
2  
3 time points of the MDS-UPDRS gait/axial score and exploratory endpoints, using ANCOVA for  
4 continuous endpoints or logistic regression for categorical or binary endpoints.  
5  
6

7  
8 Longitudinal data will use a mixed effect model repeated measurements (MMRM) analysis, to include  
9 an unstructured patient-level random effect for nominal visit, visit and visit-treatment interaction  
10 fixed effects at visits post-baseline, with adjustment for baseline covariates. To assess the slope of  
11 change over time, the longitudinal data will be analysed using a similar MMRM but with a fixed effect  
12 of time from randomisation as a continuous, rather than nominal covariate, with a treatment-time  
13 interaction to compare treatment groups and patient-level random effect for slope, with adjustment  
14 for baseline covariates.  
15  
16  
17  
18  
19  
20  
21  
22  
23  
24  
25  
26

## 27 **ETHICS AND DISSEMINATION**

28  
29  
30 This study was approved by the London-Westminster research ethics committee (reference  
31 19/LO/1705) and has been accepted by the MHRA for a clinical trials authorisation (reference CTA  
32 12854/0248/001-0001). In addition, approval has been granted from the Administration of  
33 radioactive substances advisory committee (ARSAC).  
34  
35  
36  
37  
38  
39

40 We will feedback trial results to participants and our wider cohort of research participants via our  
41 annual PD Open Day and newsletter. A lay summary of the results will be available on our website.  
42 The results will also be disseminated through publication in scientific journals and presentation at  
43 national and international conferences.  
44  
45  
46  
47  
48

49 AZA-PD has been accepted onto the NIHR Clinical Research Network (CRN) portfolio and details of  
50 this trial are also available on the following registries: ISRCTN14616801, EudraCT- 2018-003089-14.  
51  
52  
53  
54  
55  
56  
57  
58  
59  
60



## REFERENCES

1. Williams-Gray CH, Mason SL, Evans JR, et al. The CamPaIGN study of Parkinson's disease: 10-year outlook in an incident population-based cohort. *Journal of neurology, neurosurgery, and psychiatry* 2013;84(11):1258-64. doi: 10.1136/jnnp-2013-305277 [published Online First: 2013/06/20]
2. Schrag A, Jahanshahi M, Quinn N. What contributes to quality of life in patients with Parkinson's disease? *Journal of neurology, neurosurgery, and psychiatry* 2000;69(3):308-12. [published Online First: 2000/08/17]
3. Evans JR, Mason SL, Williams-Gray CH, et al. The natural history of treated Parkinson's disease in an incident, community based cohort. *Journal of neurology, neurosurgery, and psychiatry* 2011;82(10):1112-8. doi: 10.1136/jnnp.2011.240366 [published Online First: 2011/05/20]
4. Aarsland D, Larsen JP, Tandberg E, et al. Predictors of nursing home placement in Parkinson's disease: a population-based, prospective study. *Journal of the American Geriatrics Society* 2000;48(8):938-42. [published Online First: 2000/09/01]
5. Saiki M, Baker A, Williams-Gray CH, et al. Association of the human leucocyte antigen region with susceptibility to Parkinson's disease. *Journal of neurology, neurosurgery, and psychiatry* 2010;81(8):890-1. doi: 10.1136/jnnp.2008.162883 [published Online First: 2010/05/14]
6. International Parkinson Disease Genomics Consortium, Nalls MA, Plagnol V, et al. Imputation of sequence variants for identification of genetic risks for Parkinson's disease: a meta-analysis of genome-wide association studies. *Lancet* 2011;377(9766):641-9.
7. Gagliano SA, Pouget JG, Hardy J, et al. Genomics implicates adaptive and innate immunity in Alzheimer's and Parkinson's diseases. *Annals of clinical and translational neurology* 2016;3(12):924-33. doi: 10.1002/acn3.369 [published Online First: 2017/01/18]

- 1  
2  
3  
4 8. Holmans P, Moskvina V, Jones L, et al. A pathway-based analysis provides  
5 additional support for an immune-related genetic susceptibility to  
6 Parkinson's disease. *Human molecular genetics* 2013;22(5):1039-49.  
7 doi: 10.1093/hmg/dds492 [published Online First: 2012/12/12]  
8  
9
- 10  
11 9. Gao X, Chen H, Schwarzschild MA, et al. Use of ibuprofen and risk of  
12 Parkinson disease. *Neurology* 2011;76(10):863-9. doi:  
13 10.1212/WNL.0b013e31820f2d79 [published Online First: 2011/03/04]  
14  
15
- 16  
17 10. Chen H, Zhang SM, Hernan MA, et al. Nonsteroidal anti-inflammatory  
18 drugs and the risk of Parkinson disease. *Archives of neurology*  
19 2003;60(8):1059-64. doi: 10.1001/archneur.60.8.1059 [published Online  
20  
21  
22  
23  
24  
25
- 26  
27 11. Racette BA, Gross A, Vouri SM, et al. Immunosuppressants and risk of  
28 Parkinson disease. *Annals of clinical and translational neurology*  
29 2018;5(7):870-75. doi: 10.1002/acn3.580 [published Online First:  
30  
31  
32  
33
- 34  
35 12. Williams-Gray CH, Wijeyekoon R, Yarnall AJ, et al. Serum immune  
36 markers and disease progression in an incident Parkinson's disease  
37 cohort (ICICLE-PD). *Movement disorders : official journal of the*  
38 *Movement Disorder Society* 2016;31(7):995-1003. doi:  
39  
40  
41  
42
- 43  
44 13. McGeer PL, Itagaki S, Boyes BE, et al. Reactive microglia are positive for  
45 HLA-DR in the substantia nigra of Parkinson's and Alzheimer's disease  
46 brains. *Neurology* 1988;38(8):1285-91. [published Online First:  
47  
48  
49
- 50  
51 14. Mogi M, Harada M, Kondo T, et al. Interleukin-1 beta, interleukin-6,  
52 epidermal growth factor and transforming growth factor-alpha are  
53 elevated in the brain from parkinsonian patients. *Neuroscience letters*  
54 1994;180(2):147-50. [published Online First: 1994/10/24]  
55  
56
- 57  
58 15. Loeffler DA, Camp DM, Conant SB. Complement activation in the  
59 Parkinson's disease substantia nigra: an immunocytochemical study.  
60

- 1  
2  
3  
4 *Journal of neuroinflammation* 2006;3:29. doi: 10.1186/1742-2094-3-29  
5 [published Online First: 2006/10/21]  
6  
7 16. Brochard V, Combadiere B, Prigent A, et al. Infiltration of CD4+  
8 lymphocytes into the brain contributes to neurodegeneration in a mouse  
9 model of Parkinson disease. *The Journal of clinical investigation*  
10 2009;119(1):182-92. doi: 10.1172/jci36470 [published Online First:  
11 2008/12/24]  
12  
13 17. Gerhard A, Pavese N, Hotton G, et al. In vivo imaging of microglial  
14 activation with [11C](R)-PK11195 PET in idiopathic Parkinson's  
15 disease. *Neurobiology of disease* 2006;21(2):404-12. doi:  
16 10.1016/j.nbd.2005.08.002 [published Online First: 2005/09/27]  
17  
18 18. Ouchi Y, Yoshikawa E, Sekine Y, et al. Microglial activation and dopamine  
19 terminal loss in early Parkinson's disease. *Annals of neurology*  
20 2005;57(2):168-75. doi: 10.1002/ana.20338 [published Online First:  
21 2005/01/26]  
22  
23 19. Edison P, Ahmed I, Fan Z, et al. Microglia, amyloid, and glucose  
24 metabolism in Parkinson's disease with and without dementia.  
25 *Neuropsychopharmacology : official publication of the American College*  
26 *of Neuropsychopharmacology* 2013;38(6):938-49. doi:  
27 10.1038/npp.2012.255 [published Online First: 2013/01/11]  
28  
29 20. Perry VH. Innate inflammation in Parkinson's disease. *Cold Spring Harbor*  
30 *perspectives in medicine* 2012;2(9):a009373. doi:  
31 10.1101/cshperspect.a009373 [published Online First: 2012/09/07]  
32  
33 21. Gao HM, Hong JS. Why neurodegenerative diseases are progressive:  
34 uncontrolled inflammation drives disease progression. *Trends in*  
35 *immunology* 2008;29(8):357-65. doi: 10.1016/j.it.2008.05.002 [published  
36 Online First: 2008/07/05]  
37  
38 22. Grozdanov V, Bliederaeuser C, Ruf WP, et al. Inflammatory  
39 dysregulation of blood monocytes in Parkinson's disease patients. *Acta*  
40 *neuropathologica* 2014;128(5):651-63. doi: 10.1007/s00401-014-1345-4  
41  
42  
43  
44  
45  
46  
47  
48  
49  
50  
51  
52  
53  
54  
55  
56  
57  
58  
59  
60

- 1  
2  
3  
4 23. Wijeyekoon RS, Kronenberg-Versteeg D, Scott KM, et al. Peripheral  
5 innate immune and bacterial signals relate to clinical heterogeneity in  
6 Parkinson's disease. *Brain, behavior, and immunity* 2020 doi:  
7 10.1016/j.bbi.2020.01.018 [published Online First: 2020/02/02]  
8  
9  
10  
11 24. Kustrimovic N, Comi C, Magistrelli L, et al. Parkinson's disease patients  
12 have a complex phenotypic and functional Th1 bias: cross-sectional  
13 studies of CD4+ Th1/Th2/T17 and Treg in drug-naive and drug-treated  
14 patients. *Journal of neuroinflammation* 2018;15(1):205. doi:  
15 10.1186/s12974-018-1248-8 [published Online First: 2018/07/14]  
16  
17  
18  
19 25. Sommer A, Maxreiter F, Krach F, et al. Th17 Lymphocytes Induce  
20 Neuronal Cell Death in a Human iPSC-Based Model of Parkinson's  
21 Disease. *Cell stem cell* 2018;23(1):123-31.e6. doi:  
22 10.1016/j.stem.2018.06.015 [published Online First: 2018/07/07]  
23  
24  
25  
26 26. Saunders JA, Estes KA, Kosloski LM, et al. CD4+ regulatory and  
27 effector/memory T cell subsets profile motor dysfunction in Parkinson's  
28 disease. *Journal of neuroimmune pharmacology : the official journal of*  
29 *the Society on NeuroImmune Pharmacology* 2012;7(4):927-38. doi:  
30 10.1007/s11481-012-9402-z  
31  
32  
33  
34 27. Baba Y, Kuroiwa A, Uitti RJ, et al. Alterations of T-lymphocyte populations  
35 in Parkinson disease. *Parkinsonism & related disorders* 2005;11(8):493-  
36 8. doi: 10.1016/j.parkreldis.2005.07.005 [published Online First:  
37 2005/09/13]  
38  
39  
40  
41 28. Williams-Gray CH, Wijeyekoon RS, Scott KM, et al. Abnormalities of age-  
42 related T cell senescence in Parkinson's disease. *Journal of*  
43 *Neuroinflammation* 2018;15:166. doi: 10.1186/s12974-018-1206-5  
44  
45  
46  
47 29. Sulzer D, Alcalay RN, Garretti F, et al. T cells from patients with  
48 Parkinson's disease recognize alpha-synuclein peptides. *Nature*  
49 2017;546(7660):656-61. doi: 10.1038/nature22815 [published Online  
50 First: 2017/06/22]  
51  
52  
53  
54  
55  
56  
57  
58  
59  
60

- 1  
2  
3  
4 30. Scott KM, Kouli A, Yeoh SL, et al. A Systematic Review and Meta-  
5 Analysis of Alpha Synuclein Auto-Antibodies in Parkinson's Disease.  
6 *Frontiers in neurology* 2018;9:815. doi: 10.3389/fneur.2018.00815  
7 [published Online First: 2018/10/20]  
8  
9  
10  
11 31. Schroder JB, Pawlowski M, Meyer Zu Horste G, et al. Immune Cell  
12 Activation in the Cerebrospinal Fluid of Patients With Parkinson's  
13 Disease. *Frontiers in neurology* 2018;9:1081. doi:  
14 10.3389/fneur.2018.01081 [published Online First: 2019/01/09]  
15  
16  
17 32. Reynolds AD, Stone DK, Hutter JA, et al. Regulatory T cells attenuate  
18 Th17 cell-mediated nigrostriatal dopaminergic neurodegeneration in a  
19 model of Parkinson's disease. *Journal of immunology (Baltimore, Md :  
20 1950)* 2010;184(5):2261-71. doi: 10.4049/jimmunol.0901852 [published  
21 Online First: 2010/02/02]  
22  
23  
24 33. Harms AS, Cao S, Rowse AL, et al. MHCII is required for alpha-synuclein-  
25 induced activation of microglia, CD4 T cell proliferation, and  
26 dopaminergic neurodegeneration. *The Journal of neuroscience : the  
27 official journal of the Society for Neuroscience* 2013;33(23):9592-600.  
28 doi: 10.1523/jneurosci.5610-12.2013 [published Online First:  
29 2013/06/07]  
30  
31  
32 34. Tamburrino A, Churchill MJ, Wan OW, et al. Cyclosporin promotes  
33 neurorestoration and cell replacement therapy in pre-clinical models of  
34 Parkinson's disease. *Acta neuropathologica communications* 2015;3:84.  
35 doi: 10.1186/s40478-015-0263-6 [published Online First: 2015/12/17]  
36  
37  
38 35. Investigators NN-P. A pilot clinical trial of creatine and minocycline in early  
39 Parkinson disease: 18-month results. *Clin Neuropharmacol*  
40 2008;31(3):141-50. doi:  
41 https://dx.doi.org/10.1097/WNF.0b013e3181342f32  
42  
43  
44 36. NINDS Net-Pd Investigators. A randomized, double-blind, futility clinical  
45 trial of creatine and minocycline in early Parkinson disease. *Neurology*  
46 2006;66(5):664-71. doi: 10.1212/01.wnl.0000201252.57661.e1  
47  
48  
49  
50  
51  
52  
53  
54  
55  
56  
57  
58  
59  
60

- 1  
2  
3  
4 37. Investigators NETiPDF-Z. Pioglitazone in early Parkinson's disease: a  
5 phase 2, multicentre, double-blind, randomised trial.[Erratum appears in  
6 Lancet Neurol. 2015 Oct; 14(10):979]. *Lancet neurol* 2015;14(8):795-  
7 803. doi: [https://dx.doi.org/10.1016/S1474-4422\(15\)00144-1](https://dx.doi.org/10.1016/S1474-4422(15)00144-1)  
8  
9
- 10  
11 38. Gendelman HE, Zhang Y, Santamaria P, et al. Evaluation of the safety  
12 and immunomodulatory effects of sargramostim in a randomized,  
13 double-blind phase 1 clinical Parkinson's disease trial. *NPJ Parkinson's*  
14 *disease* 2017;3:10. doi: 10.1038/s41531-017-0013-5 [published Online  
15 First: 2017/06/27]  
16
- 17 39. Lennard L. The clinical pharmacology of 6-mercaptopurine. *European*  
18 *journal of clinical pharmacology* 1992;43(4):329-39. doi:  
19 10.1007/bf02220605 [published Online First: 1992/01/01]  
20
- 21 40. Casetta I, Iuliano G, Filippini G. Azathioprine for multiple sclerosis. *The*  
22 *Cochrane database of systematic reviews* 2007(4):Cd003982. doi:  
23 10.1002/14651858.CD003982.pub2 [published Online First:  
24 2007/10/19]  
25
- 26 41. Velseboer DC, de Bie RM, Wieske L, et al. Development and external  
27 validation of a prognostic model in newly diagnosed Parkinson disease.  
28 *Neurology* 2016;86(11):986-93. doi: 10.1212/wnl.0000000000002437  
29 [published Online First: 2016/02/19]  
30
- 31 42. Evans JR, Mason SL, Williams-Gray CH, et al. The factor structure of the  
32 UPDRS as an index of disease progression in Parkinson's disease.  
33 *Journal of Parkinson's disease* 2011;1(1):75-82. doi: 10.3233/jpd-2011-  
34 0002 [published Online First: 2011/01/01]  
35
- 36 43. Shulman LM, Gruber-Baldini AL, Anderson KE, et al. The clinically  
37 important difference on the unified Parkinson's disease rating scale.  
38 *Archives of neurology* 2010;67(1):64-70. doi:  
39 10.1001/archneurol.2009.295  
40
- 41 44. Goetz CG, Tilley BC, Shaftman SR, et al. Movement Disorder Society-  
42 sponsored revision of the Unified Parkinson's Disease Rating Scale  
43  
44  
45  
46  
47  
48  
49  
50  
51  
52  
53  
54  
55  
56  
57  
58  
59  
60



- (MDS-UPDRS): scale presentation and clinimetric testing results. *Movement disorders : official journal of the Movement Disorder Society* 2008;23(15):2129-70. doi: 10.1002/mds.22340
45. Hoehn MM, Yahr MD. Parkinsonism: onset, progression and mortality. *Neurology* 1967;17(5):427-42. [published Online First: 1967/05/01]
46. Hsieh S, Schubert S, Hoon C, et al. Validation of the Addenbrooke's Cognitive Examination III in frontotemporal dementia and Alzheimer's disease. *Dementia and geriatric cognitive disorders* 2013;36(3-4):242-50. doi: 10.1159/000351671 [published Online First: 2013/08/21]
47. Sheikh JI YJ. Geriatric Depression Scale (GDS): recent evidence and development of a shorter version. *Clin Gerontol* 1986;5(June):165-73.
48. Chaudhuri KR, Martinez-Martin P, Brown RG, et al. The metric properties of a novel non-motor symptoms scale for Parkinson's disease: Results from an international pilot study. *Movement disorders : official journal of the Movement Disorder Society* 2007;22(13):1901-11. doi: 10.1002/mds.21596
49. Jenkinson C, Fitzpatrick R, Peto V, et al. The Parkinson's Disease Questionnaire (PDQ-39): development and validation of a Parkinson's disease summary index score. *Age and ageing* 1997;26(5):353-7. [published Online First: 1997/11/14]
50. Tomlinson CL, Stowe R, Patel S, et al. Systematic review of levodopa dose equivalency reporting in Parkinson's disease. *Movement disorders : official journal of the Movement Disorder Society* 2010;25(15):2649-53. doi: 10.1002/mds.23429 [published Online First: 2010/11/12]
51. Lammertsma AA, Hume SP. Simplified reference tissue model for PET receptor studies. *NeuroImage* 1996;4(3 Pt 1):153-8. doi: 10.1006/nimg.1996.0066 [published Online First: 1996/12/01]

- 1  
2  
3  
4 52. Dubois, B., et al., *Diagnostic procedures for Parkinson's disease*  
5 *dementia: recommendations from the movement disorder society task*  
6 *force*. *Mov Disord*, 2007. **22**(16): p. 2314-24.  
7  
8  
9

## 10 **Acknowledgements**

11  
12  
13  
14 This research was supported by the National Institute for Health Research (NIHR) Cambridge  
15  
16 Biomedical Research Centre and the Cambridge Clinical Trials Unit (CCTU).  
17  
18  
19  
20  
21  
22

## 23 **Authors' Contributions**

24  
25  
26 CWG is the CI of this trial. JG is sub-investigator of this trial.  
27  
28

29 CWG and JG – study design and writing the protocol.  
30  
31

32 SK, EC and AC – critical review of the protocol.  
33  
34

35 SB - statistical analysis plan.  
36  
37

## 38 **Sponsorship**

39  
40  
41 This study is jointly sponsored by the University of Cambridge and Cambridge University Hospitals  
42  
43 NHS foundation Trust.  
44  
45

46  
47 Contact:

48 Ms Carrie Bayliss

49  
50  
51 Cambridge Clinical Trials Unit

52  
53 Cambridge University Hospitals NHSFT

54  
55 Hills Road

56  
57  
58 Cambridge  
59  
60



1  
2  
3 CB2 0QQ  
4

5 E-mail: cctu@addenbrookes.nhs.uk  
6  
7  
8  
9

## 10 11 **Funding Statement** 12 13

14 This trial is funded by Cambridge Centre for Parkinson-Plus and the Cure Parkinson's Trust (grant ref  
15 CW011), and supported by the NIHR Cambridge Biomedical Research Centre (grant ref no 146281).  
16

17 CHWG is supported by a RCUK/UKRI Research Innovation Fellowship awarded by the Medical  
18 Research Council (MR/R007446/1).  
19  
20  
21

22 The funders have no role in study design; collection, management, analysis, and interpretation of  
23 data; writing of the report; or the decision to submit the report for publication.  
24  
25  
26  
27  
28  
29  
30  
31

## 32 **Competing Interests Statement** 33 34

35 None declared  
36  
37  
38  
39  
40  
41  
42  
43  
44  
45  
46  
47  
48  
49  
50  
51  
52  
53  
54  
55  
56  
57  
58  
59  
60

1  
2  
3 **TABLE OF FIGURES**  
4

5  
6 Figure 1: Overview of trial timeline  
7

8  
9 Figure 2: AZA-PD eligibility criteria  
10

11  
12 Figure 3: Treatment monitoring schedule  
13  
14  
15  
16  
17  
18  
19  
20  
21  
22  
23  
24  
25  
26  
27  
28  
29  
30  
31  
32  
33  
34  
35  
36  
37  
38  
39  
40  
41  
42  
43  
44  
45  
46  
47  
48  
49  
50  
51  
52  
53  
54  
55  
56  
57  
58  
59  
60

For peer review only

1  
2  
3  
4  
5  
6  
7  
8  
9  
10  
11  
12  
13  
14  
15  
16  
17  
18  
19  
20  
21  
22  
23  
24  
25  
26  
27  
28  
29  
30  
31  
32  
33  
34  
35  
36  
37  
38  
39  
40  
41  
42  
43  
44  
45  
46  
47  
48  
49  
50  
51  
52  
53  
54  
55  
56  
57  
58  
59  
60

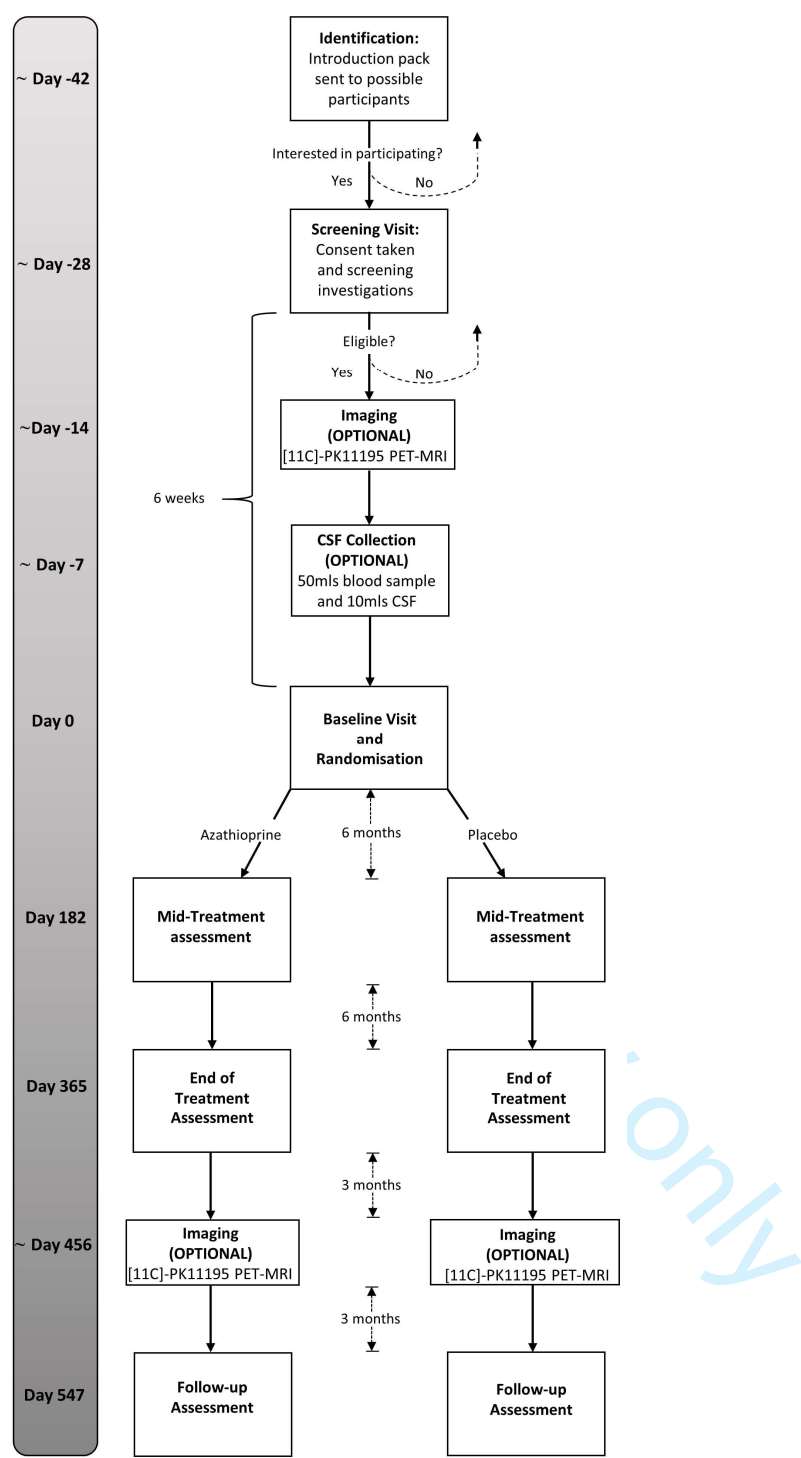

*Inclusion Criteria*

- be capable of giving signed informed consent
- be aged over 50 years
- be a fluent English speaker
- have a diagnosis of PD according to UKPDS Brain Bank Criteria
- have a disease duration of less than 3 years
- have a probability of poor outcome (postural instability/dementia/death) at 5 years from diagnosis  $\geq 50\%$  [41]
- have adequate organ and marrow function, as defined below (measured within 42 days of first dose of trial medication):
  - Haemoglobin  $\geq 110$  g/L
  - Platelet count  $\geq 130 \times 10^9$ /L
  - Neutrophil count  $\geq 1.5 \times 10^9$ /L
  - Renal function- creatinine clearance  $\geq 50$  mL/min.
  - Hepatic function- ALT and bilirubin  $\leq 2$  times the institutional upper limit of normal

*Exclusion Criteria*

- The use of prescribed immunomodulatory or regular anti-inflammatory drugs
- Known inflammatory or autoimmune disease, or chronic or latent infection
- Active infection requiring the use of parenteral antimicrobial agents within 2 months prior to the first dose of trial treatment
- Skin or solid organ malignancy within the 5 years prior to the screening assessment
- The inability to take or swallow oral medication
- Parkinson's Disease Dementia according to MDS PD Dementia criteria [52]
- A positive test for HIV or Hepatitis B or C
- TPMT deficiency
- A lack of immunity to VZV
- Negative EBV IgG
- Chronic liver disease
- Renal impairment - creatinine clearance  $< 50$  mL/min
- Current or previous haematological malignancy
- Concomitant allopurinol
- Any concurrent medical or psychiatric condition or disease that is likely to interfere with the trial procedures or results, or that in the opinion of the investigator, would constitute a hazard for participating in this trial
- Receipt of live, attenuated vaccine within the 30 days prior to the screening assessment
- Women of childbearing potential. Female patients must be surgically sterile or be postmenopausal
- Male patients must be surgically sterile or must agree to use effective contraception during the period of therapy and for 6 months after the last dose of the trial treatment
- Known hypersensitivity to azathioprine or its excipient
- Received an investigational drug or used an invasive investigational medical device within 4 weeks before the screening assessment or is currently enrolled in an interventional investigational trial

1  
2  
3  
4  
5  
6  
7  
8  
9  
10  
11  
12  
13  
14  
15  
16  
17  
18  
19  
20  
21  
22  
23  
24  
25  
26  
27  
28  
29  
30  
31  
32  
33  
34  
35  
36  
37  
38  
39  
40  
41  
42  
43  
44  
45  
46  
47  
48  
49  
50  
51  
52  
53  
54  
55  
56  
57  
58  
59  
60

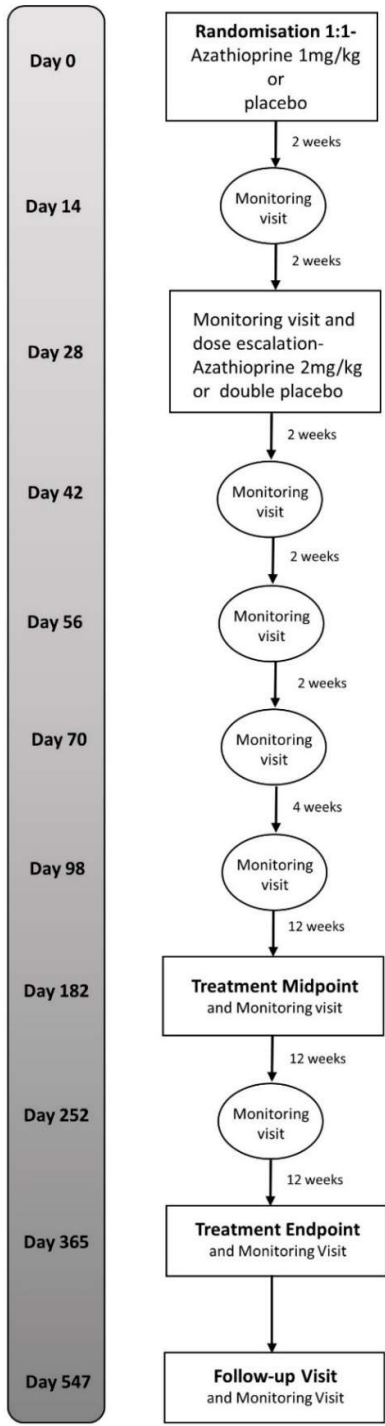

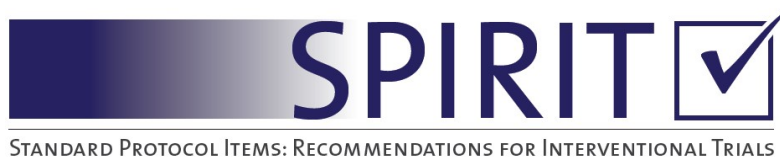

SPIRIT 2013 Checklist: Recommended items to address in a clinical trial protocol and related documents\*

| Section/item                      | Item No | Description                                                                                                                                                                                                                                                                                                                                         |
|-----------------------------------|---------|-----------------------------------------------------------------------------------------------------------------------------------------------------------------------------------------------------------------------------------------------------------------------------------------------------------------------------------------------------|
| <b>Administrative information</b> |         |                                                                                                                                                                                                                                                                                                                                                     |
| Title                             | 1       | Descriptive title identifying the study design, population, interventions, and, if applicable, trial acronym ✓                                                                                                                                                                                                                                      |
| Trial registration                | 2a      | Trial identifier and registry name. If not yet registered, name of intended registry ✓                                                                                                                                                                                                                                                              |
|                                   | 2b      | All items from the World Health Organization Trial Registration Data Set ✓                                                                                                                                                                                                                                                                          |
| Protocol version                  | 3       | Date and version identifier ✓                                                                                                                                                                                                                                                                                                                       |
| Funding                           | 4       | Sources and types of financial, material, and other support “funding statement” ✓                                                                                                                                                                                                                                                                   |
| Roles and responsibilities        | 5a      | Names, affiliations, and roles of protocol contributors “Authors’ contribution” ✓                                                                                                                                                                                                                                                                   |
|                                   | 5b      | Name and contact information for the trial sponsor “Sponsor contact” ✓                                                                                                                                                                                                                                                                              |
|                                   | 5c      | Role of study sponsor and funders, if any, in study design; collection, management, analysis, and interpretation of data; writing of the report; and the decision to submit the report for publication, including whether they will have ultimate authority over any of these activities “Trial monitoring and oversight” and “Funding statement” ✓ |
|                                   | 5d      | Composition, roles, and responsibilities of the coordinating centre, steering committee, endpoint adjudication committee, data management team, and other individuals or groups overseeing the trial, if applicable (see Item 21a for data monitoring committee) – safety monitoring and authors’ contributions ✓                                   |
| <b>Introduction</b>               |         |                                                                                                                                                                                                                                                                                                                                                     |
| Background and rationale          | 6a      | Description of research question and justification for undertaking the trial, including summary of relevant studies (published and unpublished) examining benefits and harms for each intervention – covered in the introduction ✓                                                                                                                  |

|    |                                                           |     |                                                                                                                                                                                                                                                                                                                                                                                                       |
|----|-----------------------------------------------------------|-----|-------------------------------------------------------------------------------------------------------------------------------------------------------------------------------------------------------------------------------------------------------------------------------------------------------------------------------------------------------------------------------------------------------|
| 1  |                                                           | 6b  | Explanation for choice of comparators – see last paragraph of introduction ✓                                                                                                                                                                                                                                                                                                                          |
| 2  |                                                           |     |                                                                                                                                                                                                                                                                                                                                                                                                       |
| 3  |                                                           |     |                                                                                                                                                                                                                                                                                                                                                                                                       |
| 4  | Objectives                                                | 7   | Specific objectives or hypotheses – in “trial overview” ✓                                                                                                                                                                                                                                                                                                                                             |
| 5  |                                                           |     |                                                                                                                                                                                                                                                                                                                                                                                                       |
| 6  | Trial design                                              | 8   | Description of trial design including type of trial (eg, parallel group, crossover, factorial, single group), allocation ratio, and framework (eg, superiority, equivalence, noninferiority, exploratory) – “trial overview” ✓                                                                                                                                                                        |
| 7  |                                                           |     |                                                                                                                                                                                                                                                                                                                                                                                                       |
| 8  |                                                           |     |                                                                                                                                                                                                                                                                                                                                                                                                       |
| 9  |                                                           |     |                                                                                                                                                                                                                                                                                                                                                                                                       |
| 10 |                                                           |     |                                                                                                                                                                                                                                                                                                                                                                                                       |
| 11 |                                                           |     |                                                                                                                                                                                                                                                                                                                                                                                                       |
| 12 | <b>Methods: Participants, interventions, and outcomes</b> |     |                                                                                                                                                                                                                                                                                                                                                                                                       |
| 13 |                                                           |     |                                                                                                                                                                                                                                                                                                                                                                                                       |
| 14 | Study setting                                             | 9   | Description of study settings (eg, community clinic, academic hospital) and list of countries where data will be collected. Reference to where list of study sites can be obtained – “Participant identification” ✓                                                                                                                                                                                   |
| 15 |                                                           |     |                                                                                                                                                                                                                                                                                                                                                                                                       |
| 16 |                                                           |     |                                                                                                                                                                                                                                                                                                                                                                                                       |
| 17 |                                                           |     |                                                                                                                                                                                                                                                                                                                                                                                                       |
| 18 | Eligibility criteria                                      | 10  | Inclusion and exclusion criteria for participants. If applicable, eligibility criteria for study centres and individuals who will perform the interventions (eg, surgeons, psychotherapists) “Inclusion criteria” and “exclusion criteria”. ✓                                                                                                                                                         |
| 19 |                                                           |     |                                                                                                                                                                                                                                                                                                                                                                                                       |
| 20 |                                                           |     |                                                                                                                                                                                                                                                                                                                                                                                                       |
| 21 |                                                           |     |                                                                                                                                                                                                                                                                                                                                                                                                       |
| 22 |                                                           |     |                                                                                                                                                                                                                                                                                                                                                                                                       |
| 23 | Interventions                                             | 11a | Interventions for each group with sufficient detail to allow replication, including how and when they will be administered – “trial procedures” ✓                                                                                                                                                                                                                                                     |
| 24 |                                                           |     |                                                                                                                                                                                                                                                                                                                                                                                                       |
| 25 |                                                           |     |                                                                                                                                                                                                                                                                                                                                                                                                       |
| 26 |                                                           |     |                                                                                                                                                                                                                                                                                                                                                                                                       |
| 27 |                                                           |     |                                                                                                                                                                                                                                                                                                                                                                                                       |
| 28 |                                                           | 11b | Criteria for discontinuing or modifying allocated interventions for a given trial participant (eg, drug dose change in response to harms, participant request, or improving/worsening disease) “Treatment allocation and safety monitoring” ✓                                                                                                                                                         |
| 29 |                                                           |     |                                                                                                                                                                                                                                                                                                                                                                                                       |
| 30 |                                                           |     |                                                                                                                                                                                                                                                                                                                                                                                                       |
| 31 |                                                           |     |                                                                                                                                                                                                                                                                                                                                                                                                       |
| 32 |                                                           |     |                                                                                                                                                                                                                                                                                                                                                                                                       |
| 33 |                                                           | 11c | Strategies to improve adherence to intervention protocols, and any procedures for monitoring adherence (eg, drug tablet return, laboratory tests) – “Treatment allocation and safety monitoring” ✓                                                                                                                                                                                                    |
| 34 |                                                           |     |                                                                                                                                                                                                                                                                                                                                                                                                       |
| 35 |                                                           |     |                                                                                                                                                                                                                                                                                                                                                                                                       |
| 36 |                                                           |     |                                                                                                                                                                                                                                                                                                                                                                                                       |
| 37 |                                                           | 11d | Relevant concomitant care and interventions that are permitted or prohibited during the trial See “overview” and exclusion criteria. ✓                                                                                                                                                                                                                                                                |
| 38 |                                                           |     |                                                                                                                                                                                                                                                                                                                                                                                                       |
| 39 |                                                           |     |                                                                                                                                                                                                                                                                                                                                                                                                       |
| 40 | Outcomes                                                  | 12  | Primary, secondary, and other outcomes, including the specific measurement variable (eg, systolic blood pressure), analysis metric (eg, change from baseline, final value, time to event), method of aggregation (eg, median, proportion), and time point for each outcome. Explanation of the clinical relevance of chosen efficacy and harm outcomes is strongly recommended – “outcome measures” ✓ |
| 41 |                                                           |     |                                                                                                                                                                                                                                                                                                                                                                                                       |
| 42 |                                                           |     |                                                                                                                                                                                                                                                                                                                                                                                                       |
| 43 |                                                           |     |                                                                                                                                                                                                                                                                                                                                                                                                       |
| 44 |                                                           |     |                                                                                                                                                                                                                                                                                                                                                                                                       |
| 45 |                                                           |     |                                                                                                                                                                                                                                                                                                                                                                                                       |
| 46 |                                                           |     |                                                                                                                                                                                                                                                                                                                                                                                                       |
| 47 |                                                           |     |                                                                                                                                                                                                                                                                                                                                                                                                       |
| 48 | Participant timeline                                      | 13  | Time schedule of enrolment, interventions (including any run-ins and washouts), assessments, and visits for participants. A schematic diagram is highly recommended (see Figure) Figure 1 and table 1 ✓                                                                                                                                                                                               |
| 49 |                                                           |     |                                                                                                                                                                                                                                                                                                                                                                                                       |
| 50 |                                                           |     |                                                                                                                                                                                                                                                                                                                                                                                                       |
| 51 |                                                           |     |                                                                                                                                                                                                                                                                                                                                                                                                       |
| 52 | Sample size                                               | 14  | Estimated number of participants needed to achieve study objectives and how it was determined, including clinical and statistical assumptions supporting any sample size calculations “sample size calculation” ✓                                                                                                                                                                                     |
| 53 |                                                           |     |                                                                                                                                                                                                                                                                                                                                                                                                       |
| 54 |                                                           |     |                                                                                                                                                                                                                                                                                                                                                                                                       |
| 55 |                                                           |     |                                                                                                                                                                                                                                                                                                                                                                                                       |
| 56 |                                                           |     |                                                                                                                                                                                                                                                                                                                                                                                                       |
| 57 |                                                           |     |                                                                                                                                                                                                                                                                                                                                                                                                       |
| 58 |                                                           |     |                                                                                                                                                                                                                                                                                                                                                                                                       |
| 59 |                                                           |     |                                                                                                                                                                                                                                                                                                                                                                                                       |
| 60 |                                                           |     |                                                                                                                                                                                                                                                                                                                                                                                                       |

1 Recruitment 15 Strategies for achieving adequate participant enrolment to reach  
2 target sample size “participant identification” ✓  
3

4 **Methods: Assignment of interventions (for controlled trials)**

5 Allocation:

6  
7  
8 Sequence 16a Method of generating the allocation sequence (eg, computer-  
9 generation generated random numbers), and list of any factors for stratification.  
10 To reduce predictability of a random sequence, details of any planned  
11 restriction (eg, blocking) should be provided in a separate document  
12 that is unavailable to those who enrol participants or assign  
13 interventions IMP, treatment allocation and safety monitoring ✓  
14

15  
16 Allocation 16b Mechanism of implementing the allocation sequence (eg, central  
17 concealment telephone; sequentially numbered, opaque, sealed envelopes),  
18 mechanism describing any steps to conceal the sequence until interventions are  
19 assigned Treatment allocation and safety monitoring ✓  
20

21 Implementation 16c Who will generate the allocation sequence, who will enrol participants,  
22 and who will assign participants to interventions Treatment allocation  
23 and safety monitoring ✓  
24

25 Blinding 17a Who will be blinded after assignment to interventions (eg, trial  
26 (masking) participants, care providers, outcome assessors, data analysts), and  
27 how Treatment allocation and safety monitoring ✓  
28

29 17b If blinded, circumstances under which unblinding is permissible, and  
30 procedure for revealing a participant’s allocated intervention during  
31 the trial Treatment allocation and safety monitoring ✓  
32  
33

34 **Methods: Data collection, management, and analysis**

35 Data collection 18a Plans for assessment and collection of outcome, baseline, and other  
36 methods trial data, including any related processes to promote data quality (eg,  
37 duplicate measurements, training of assessors) and a description of  
38 study instruments (eg, questionnaires, laboratory tests) along with  
39 their reliability and validity, if known. Reference to where data  
40 collection forms can be found, if not in the protocol “trial procedures”  
41 ✓  
42

43  
44 18b Plans to promote participant retention and complete follow-up,  
45 including list of any outcome data to be collected for participants who  
46 discontinue or deviate from intervention protocols Treatment allocation  
47 and safety monitoring ✓  
48  
49

50 Data 19 Plans for data entry, coding, security, and storage, including any  
51 management related processes to promote data quality (eg, double data entry;  
52 range checks for data values). Reference to where details of data  
53 management procedures can be found, if not in the protocol Data  
54 analysis ✓  
55  
56  
57  
58  
59  
60



- 1  
2  
3  
4  
5  
6  
7  
8  
9  
10  
11  
12
- |                     |     |                                                                                                                                                                                                        |
|---------------------|-----|--------------------------------------------------------------------------------------------------------------------------------------------------------------------------------------------------------|
| Statistical methods | 20a | Statistical methods for analysing primary and secondary outcomes. Reference to where other details of the statistical analysis plan can be found, if not in the protocol – <b>Data analysis</b> ✓      |
|                     | 20b | Methods for any additional analyses (eg, subgroup and adjusted analyses) <b>Data analysis</b> ✓                                                                                                        |
|                     | 20c | Definition of analysis population relating to protocol non-adherence (eg, as randomised analysis), and any statistical methods to handle missing data (eg, multiple imputation) <b>Data analysis</b> ✓ |

### 13 **Methods: Monitoring**

- 14  
15  
16  
17  
18  
19  
20  
21  
22  
23  
24  
25  
26  
27  
28  
29  
30  
31  
32  
33  
34  
35  
36  
37
- |                 |     |                                                                                                                                                                                                                                                                                                                                                                                                                |
|-----------------|-----|----------------------------------------------------------------------------------------------------------------------------------------------------------------------------------------------------------------------------------------------------------------------------------------------------------------------------------------------------------------------------------------------------------------|
| Data monitoring | 21a | Composition of data monitoring committee (DMC); summary of its role and reporting structure; statement of whether it is independent from the sponsor and competing interests; and reference to where further details about its charter can be found, if not in the protocol. Alternatively, an explanation of why a DMC is not needed. <b>Last paragraph of “Treatment allocation and safety monitoring”</b> ✓ |
|                 | 21b | Description of any interim analyses and stopping guidelines, including who will have access to these interim results and make the final decision to terminate the trial <b>Last paragraph of “Treatment allocation and safety monitoring”</b> ✓                                                                                                                                                                |
| Harms           | 22  | Plans for collecting, assessing, reporting, and managing solicited and spontaneously reported adverse events and other unintended effects of trial interventions or trial conduct- <b>Treatment allocation and safety monitoring</b> ✓                                                                                                                                                                         |
| Auditing        | 23  | Frequency and procedures for auditing trial conduct, if any, and whether the process will be independent from investigators and the sponsor <b>“Role of the Sponsor”</b> ✓                                                                                                                                                                                                                                     |

### 38 **Ethics and dissemination**

- 39  
40  
41  
42  
43  
44  
45  
46  
47  
48  
49  
50  
51  
52  
53  
54  
55  
56  
57  
58  
59  
60
- |                          |     |                                                                                                                                                                                                                                                                              |
|--------------------------|-----|------------------------------------------------------------------------------------------------------------------------------------------------------------------------------------------------------------------------------------------------------------------------------|
| Research ethics approval | 24  | Plans for seeking research ethics committee/institutional review board (REC/IRB) approval – <b>Ethics and dissemination</b> ✓                                                                                                                                                |
| Protocol amendments      | 25  | Plans for communicating important protocol modifications (eg, changes to eligibility criteria, outcomes, analyses) to relevant parties (eg, investigators, REC/IRBs, trial participants, trial registries, journals, regulators) – <b>“Trial monitoring and oversight”</b> ✓ |
| Consent or assent        | 26a | Who will obtain informed consent or assent from potential trial participants or authorised surrogates, and how (see Item 32) – <b>Participant identification</b> ✓                                                                                                           |
|                          | 26b | Additional consent provisions for collection and use of participant data and biological specimens in ancillary studies, if applicable <b>NA</b>                                                                                                                              |

|    |                               |     |                                                                                                                                                                                                                                                                                                                |
|----|-------------------------------|-----|----------------------------------------------------------------------------------------------------------------------------------------------------------------------------------------------------------------------------------------------------------------------------------------------------------------|
| 1  | Confidentiality               | 27  | How personal information about potential and enrolled participants will be collected, shared, and maintained in order to protect confidentiality before, during, and after the trial – Section “data analysis”- ✓                                                                                              |
| 2  |                               |     |                                                                                                                                                                                                                                                                                                                |
| 3  |                               |     |                                                                                                                                                                                                                                                                                                                |
| 4  |                               |     |                                                                                                                                                                                                                                                                                                                |
| 5  | Declaration of interests      | 28  | Financial and other competing interests for principal investigators for the overall trial and each study site -Competing interests statement✓                                                                                                                                                                  |
| 6  |                               |     |                                                                                                                                                                                                                                                                                                                |
| 7  |                               |     |                                                                                                                                                                                                                                                                                                                |
| 8  | Access to data                | 29  | Statement of who will have access to the final trial dataset, and disclosure of contractual agreements that limit such access for investigators Section “data analysis”- ✓                                                                                                                                     |
| 9  |                               |     |                                                                                                                                                                                                                                                                                                                |
| 10 |                               |     |                                                                                                                                                                                                                                                                                                                |
| 11 |                               |     |                                                                                                                                                                                                                                                                                                                |
| 12 | Ancillary and post-trial care | 30  | Provisions, if any, for ancillary and post-trial care, and for compensation to those who suffer harm from trial participation – Last paragraph of “treatment allocation, blinding and safety monitoring” ✓                                                                                                     |
| 13 |                               |     |                                                                                                                                                                                                                                                                                                                |
| 14 |                               |     |                                                                                                                                                                                                                                                                                                                |
| 15 |                               |     |                                                                                                                                                                                                                                                                                                                |
| 16 |                               |     |                                                                                                                                                                                                                                                                                                                |
| 17 | Dissemination policy          | 31a | Plans for investigators and sponsor to communicate trial results to participants, healthcare professionals, the public, and other relevant groups (eg, via publication, reporting in results databases, or other data sharing arrangements), including any publication restrictions Ethics and dissemination ✓ |
| 18 |                               |     |                                                                                                                                                                                                                                                                                                                |
| 19 |                               |     |                                                                                                                                                                                                                                                                                                                |
| 20 |                               |     |                                                                                                                                                                                                                                                                                                                |
| 21 |                               |     |                                                                                                                                                                                                                                                                                                                |
| 22 |                               |     |                                                                                                                                                                                                                                                                                                                |
| 23 |                               |     |                                                                                                                                                                                                                                                                                                                |
| 24 |                               | 31b | Authorship eligibility guidelines and any intended use of professional writers NA                                                                                                                                                                                                                              |
| 25 |                               |     |                                                                                                                                                                                                                                                                                                                |
| 26 |                               |     |                                                                                                                                                                                                                                                                                                                |
| 27 |                               | 31c | Plans, if any, for granting public access to the full protocol, participant-level dataset, and statistical code NA                                                                                                                                                                                             |
| 28 |                               |     |                                                                                                                                                                                                                                                                                                                |
| 29 |                               |     |                                                                                                                                                                                                                                                                                                                |
| 30 | <b>Appendices</b>             |     |                                                                                                                                                                                                                                                                                                                |
| 31 |                               |     |                                                                                                                                                                                                                                                                                                                |
| 32 | Informed consent materials    | 32  | Model consent form and other related documentation given to participants and authorised surrogates                                                                                                                                                                                                             |
| 33 |                               |     |                                                                                                                                                                                                                                                                                                                |
| 34 |                               |     |                                                                                                                                                                                                                                                                                                                |
| 35 | Biological specimens          | 33  | Plans for collection, laboratory evaluation, and storage of biological specimens for genetic or molecular analysis in the current trial and for future use in ancillary studies, if applicable                                                                                                                 |
| 36 |                               |     |                                                                                                                                                                                                                                                                                                                |
| 37 |                               |     |                                                                                                                                                                                                                                                                                                                |
| 38 |                               |     |                                                                                                                                                                                                                                                                                                                |

---

\*It is strongly recommended that this checklist be read in conjunction with the SPIRIT 2013 Explanation & Elaboration for important clarification on the items. Amendments to the protocol should be tracked and dated. The SPIRIT checklist is copyrighted by the SPIRIT Group under the Creative Commons “[Attribution-NonCommercial-NoDerivs 3.0 Unported](https://creativecommons.org/licenses/by-nc-nd/3.0/)” license.

# BMJ Open

## Azathioprine immunosuppression and disease modification in Parkinson's disease (AZA-PD): a randomised double-blind placebo-controlled phase II trial protocol

|                                 |                                                                                                                                                                                                                                                                                                                                                                                                                                                                               |
|---------------------------------|-------------------------------------------------------------------------------------------------------------------------------------------------------------------------------------------------------------------------------------------------------------------------------------------------------------------------------------------------------------------------------------------------------------------------------------------------------------------------------|
| Journal:                        | <i>BMJ Open</i>                                                                                                                                                                                                                                                                                                                                                                                                                                                               |
| Manuscript ID                   | bmjopen-2020-040527.R1                                                                                                                                                                                                                                                                                                                                                                                                                                                        |
| Article Type:                   | Protocol                                                                                                                                                                                                                                                                                                                                                                                                                                                                      |
| Date Submitted by the Author:   | 01-Sep-2020                                                                                                                                                                                                                                                                                                                                                                                                                                                                   |
| Complete List of Authors:       | Greenland, Julia; University of Cambridge, Department of Clinical Neurosciences<br>Cutting, Emma; University of Cambridge, Department of Clinical Neurosciences; Cambridge Clinical Trials Unit<br>Kadyan, Sonakshi; Cambridge Clinical Trials Unit<br>Bond, Simon; Cambridge Clinical Trials Unit<br>Chhabra, Anita; Cambridge University Hospitals NHS Foundation Trust, Pharmacy<br>Williams-Gray, Caroline; University of Cambridge, Department of Clinical Neurosciences |
| <b>Primary Subject Heading</b>: | Neurology                                                                                                                                                                                                                                                                                                                                                                                                                                                                     |
| Secondary Subject Heading:      | Pharmacology and therapeutics                                                                                                                                                                                                                                                                                                                                                                                                                                                 |
| Keywords:                       | Parkinson-s disease < NEUROLOGY, THERAPEUTICS, IMMUNOLOGY                                                                                                                                                                                                                                                                                                                                                                                                                     |
|                                 |                                                                                                                                                                                                                                                                                                                                                                                                                                                                               |

SCHOLARONE™  
Manuscripts



I, the Submitting Author has the right to grant and does grant on behalf of all authors of the Work (as defined in the below author licence), an exclusive licence and/or a non-exclusive licence for contributions from authors who are: i) UK Crown employees; ii) where BMJ has agreed a CC-BY licence shall apply, and/or iii) in accordance with the terms applicable for US Federal Government officers or employees acting as part of their official duties; on a worldwide, perpetual, irrevocable, royalty-free basis to BMJ Publishing Group Ltd ("BMJ") its licensees and where the relevant Journal is co-owned by BMJ to the co-owners of the Journal, to publish the Work in this journal and any other BMJ products and to exploit all rights, as set out in our [licence](#).

The Submitting Author accepts and understands that any supply made under these terms is made by BMJ to the Submitting Author unless you are acting as an employee on behalf of your employer or a postgraduate student of an affiliated institution which is paying any applicable article publishing charge ("APC") for Open Access articles. Where the Submitting Author wishes to make the Work available on an Open Access basis (and intends to pay the relevant APC), the terms of reuse of such Open Access shall be governed by a Creative Commons licence – details of these licences and which [Creative Commons](#) licence will apply to this Work are set out in our licence referred to above.

Other than as permitted in any relevant BMJ Author's Self Archiving Policies, I confirm this Work has not been accepted for publication elsewhere, is not being considered for publication elsewhere and does not duplicate material already published. I confirm all authors consent to publication of this Work and authorise the granting of this licence.

## Title

Azathioprine immunosuppression and disease modification in Parkinson's disease (AZA-PD): a randomised double-blind placebo-controlled phase II trial protocol

## Authors

Julia C. Greenland<sup>1</sup>, Emma Cutting<sup>1,2</sup>, Sonakshi Kadyan<sup>2</sup>, Simon Bond<sup>2</sup>, Anita Chhabra<sup>3</sup>, Caroline H. Williams-Gray<sup>1</sup>

<sup>1</sup>Department of Clinical Neurosciences, John van Geest Centre for Brain Repair, University of Cambridge, Cambridge, UK.

<sup>2</sup>Cambridge Clinical Trials Unit, Cambridge University Hospitals NHS Foundation Trust, Cambridge

<sup>3</sup> Pharmacy, Cambridge University Hospitals NHS Foundation Trust, Cambridge

## Corresponding author

Julia Greenland

John van Geest Centre for Brain Repair, Department of Clinical Neurosciences, University of Cambridge, Forvie Site, Cambridge CB2 0PY, United Kingdom.

Tel: +44 1223 331160

Fax: +44 1223 331174

[Jcg69@cam.ac.uk](mailto:Jcg69@cam.ac.uk)

## Keywords

Parkinson's disease, immune system, immunosuppression, clinical trial, therapy

## Word Count

3951

1  
2  
3  
4  
5  
6  
7  
8  
9  
10  
11  
12  
13  
14  
15  
16  
17  
18  
19  
20  
21  
22  
23  
24  
25  
26  
27  
28  
29  
30  
31  
32  
33  
34  
35  
36  
37  
38  
39  
40  
41  
42  
43  
44  
45  
46  
47  
48  
49  
50  
51  
52  
53  
54  
55  
56  
57  
58  
59  
60

For peer review only

## Abstract

### *Introduction*

The immune system is implicated in the aetiology and progression of Parkinson's disease (PD). Inflammation and immune activation occur both in the brain and in the periphery, and a pro-inflammatory cytokine profile is associated with more rapid clinical progression. Furthermore, the risk of developing PD is related to genetic variation in immune-related genes, and reduced by the use of immunosuppressant medication. We are therefore conducting a 'proof of concept' trial of azathioprine, an immunosuppressant medication, to investigate whether suppressing the peripheral immune system has a disease-modifying effect in PD.

### *Methods and analysis*

AZA-PD is a phase II randomised placebo-controlled double-blind trial in early PD. Sixty participants, with clinical markers indicating an elevated risk of disease progression and no inflammatory or immune comorbidity, will be treated (azathioprine: placebo, 1:1) for 12 months, with a further 6-months follow-up. The primary outcome is the change in the MDS-UPDRS gait/axial score in the OFF state over the 12-month treatment period. Exploratory outcomes include additional measures of motor and cognitive function, non-motor symptoms and quality of life. In addition, peripheral and central immune markers will be investigated through analysis of blood, cerebrospinal fluid and PK-11195 PET imaging.

### *Ethics and dissemination*

The study was approved by the London-Westminster research ethics committee (reference 19/LO/1705) and has been accepted by the MHRA for a clinical trials authorisation (reference CTA 12854/0248/001-0001). In addition, approval has been granted from the Administration of Radioactive Substances Advisory Committee (ARSAC). The results of this trial will be disseminated

1  
2  
3 through publication in scientific journals and presentation at national and international conferences  
4  
5 and a lay summary will be available on our website.  
6  
7

8  
9 *Trial Registration*

10  
11 ISRCTN14616801, 14/5/2020. EudraCT- 2018-003089-14  
12  
13

14 Protocol version 1.1: AZA-PD CCTU0218  
15  
16  
17  
18  
19

20  
21 **Strengths and limitations of this study**  
22

- 23 • First clinical trial of a peripherally acting immunosuppressive drug in Parkinson's disease
- 24 • Robust, randomised double-blind placebo-controlled design
- 25 • Novel patient stratification approach with recruitment of a more rapidly progressing
- 26 subgroup to optimise chance of demonstrating clinical effect
- 27
- 28 • Detailed exploratory measures examining peripheral and central immune profile in PD to
- 29 demonstrate proof of mechanism
- 30
- 31 • As a single centre 'proof of concept' trial, sample size is limited to 60 participants.  
32  
33  
34  
35  
36  
37  
38  
39  
40  
41  
42  
43  
44  
45  
46  
47  
48  
49  
50  
51  
52  
53  
54  
55  
56  
57  
58  
59  
60



## INTRODUCTION

Parkinson's disease (PD) is a common neurodegenerative disorder diagnosed clinically by key motor features. The core pathology in PD involves the loss of dopaminergic neurons in the substantia nigra (SN) with intracellular accumulation of alpha-synuclein aggregates (Lewy bodies). Dopamine replacement therapy can control some of the motor symptoms. However, other problems including impaired balance and cognitive dysfunction are due to more widespread neurodegenerative pathology and are consequently unresponsive to dopaminergic therapies. These symptoms progress such that by 10 years from diagnosis, around two thirds of patients have balance and walking difficulties, and around half have dementia,[1] with a profound impact on quality of life [2, 3] and care requirements.[4] There are currently no treatments to alter disease course and prevent these devastating complications, hence there is an urgent need to find effective disease-modifying therapies for PD. There is increasing evidence that the immune system plays an important role in driving neurodegeneration in PD, and we propose that targeting the immune system may be an effective strategy for slowing disease progression.

The link between genetic variation in immune pathways and risk of Parkinson's disease is well-established. Risk of developing PD is associated with polymorphisms in the Human Leucocyte Antigen (HLA) region, which encodes proteins vital to antigen recognition and presentation.[5, 6] Large scale analyses of Genome Wide Association Study (GWAS) data also implicate the immune system in PD, demonstrating heritability enrichment for genes of the adaptive immune system, including those involved in lymphocyte regulation and cytokine signalling pathways.[7, 8] Further evidence of an immune contribution to PD risk comes from epidemiological studies: individuals who regularly take non-steroidal anti-inflammatory drugs (NSAIDs) have reduced risk of developing PD [9, 10], as do those on immunosuppressive therapy.[11] There is also evidence that immune activation impacts on disease progression rate. In a large incident PD cohort, a pro-inflammatory serum cytokine profile at baseline

1  
2  
3 was associated with faster motor progression and impaired cognition over 36 months of follow-  
4  
5 up.[12]  
6

7  
8 Activation of microglia, the inflammatory cells of the brain, has been clearly demonstrated in PD  
9  
10 patients both at post-mortem [13-16] and using [<sup>11</sup>C]-PK11195 positron emission tomography (PET)  
11  
12 imaging in-vivo.[17-19] These cells have a role in responding to tissue injury, regulating the cerebral  
13  
14 microenvironment, and antigen presentation.[20] It is thought that this activation is driven by toxic  
15  
16 misfolded or post-translationally modified forms of alpha-synuclein released by degenerating cells,  
17  
18 leading to secretion of proinflammatory and neurotoxic molecules, resulting in a cyclical process of  
19  
20 cell damage.[21]  
21  
22

23  
24 Abnormalities in the peripheral immune profile in PD are also well demonstrated and include  
25  
26 alterations in both the innate and adaptive immune compartments. There is a shift towards 'classical'  
27  
28 (inflammatory) monocytes with elevated expression of activation markers,[22] particularly in patients  
29  
30 at higher dementia risk.[23] In the T lymphocyte compartment, several authors have reported bias  
31  
32 towards pro-inflammatory CD4+ lymphocyte subsets and production of pro-inflammatory  
33  
34 cytokines.[24-27] There may also be a reduction in the number and function of CD4+ T-regulatory  
35  
36 (Treg) cells, whose role is to counter this pro-inflammatory response.[24, 26] In addition, changes in  
37  
38 the CD8 compartment have been reported, with increased expression of activation markers and  
39  
40 reduced markers of age-related senescence.[28]  
41  
42  
43

44  
45 Importantly, T-cells with specificity for epitopes of alpha-synuclein have been identified and reported  
46  
47 to occur at higher frequency in PD than controls; furthermore their frequency was closely associated  
48  
49 with possession of known PD risk alleles at the HLA locus[29], thus suggesting that alpha-synuclein  
50  
51 may drive a peripheral adaptive immune response as well as an innate response of microglia in the  
52  
53 brain. Elevated levels of alpha-synuclein specific antibodies are also present in the early stages of  
54  
55 PD.[30] Peripheral immune cells may contribute to brain inflammation and neurotoxicity by trafficking  
56  
57 into the central nervous system in PD. CD4+ and CD8+ lymphocytes have been shown to be present  
58  
59  
60

1  
2  
3 in increased numbers in the SN at post-mortem in PD patients,[16, 25] as well as in ex-vivo  
4 cerebrospinal fluid (CSF) samples.[31] The precise mechanism by which peripheral immune cells drive  
5 neuronal damage in PD is still unclear, but it has recently been demonstrated that Th17 cells from PD  
6 patients drive cell death in autologous iPSC-derived dopaminergic midbrain neurons.[25]  
7  
8  
9

10  
11  
12 Immune manipulation in animal models of PD alters disease susceptibility and severity. Using an MPTP  
13 mouse model of PD, studies have demonstrated that a lack of CD4+ lymphocytes attenuates  
14 dopaminergic cell death,[16] as does administration of Treg cells.[32] In mice that over-express alpha-  
15 synuclein, knockout of MHCII prevents both microglial activation and dopaminergic  
16 neurodegeneration.[33] Furthermore, cyclosporin, a widely used immunosuppressant, is effective in  
17 improving motor and cognitive deficits in multiple mouse models of PD.[34]  
18  
19  
20  
21  
22  
23  
24  
25

26  
27 Although animal models of PD indicate that immunomodulatory therapies may have efficacy in  
28 protecting against neurodegeneration, there is limited clinical trial data in PD to date. Phase II trials of  
29 minocycline and pioglitazone, agents which reduce microglial activation in the brain in animal models,  
30 have been negative.[35-37] An early phase trial of sargramostim, a human recombinant granulocyte-  
31 macrophage colony-stimulating factor which promotes differentiation of pro-inflammatory T-effector  
32 cells into Treg cells has reported a modest improvement in an exploratory outcome of motor function  
33 over 8-weeks treatment.[38]  
34  
35  
36  
37  
38  
39  
40  
41  
42

43 We propose that direct suppression of the peripheral immune system is an alternative, highly relevant  
44 therapeutic strategy which has not been tested in clinical trials to date. Azathioprine is an  
45 immunosuppressant drug widely used in clinical practice for a range of immune-related conditions. It  
46 is a purine analogue which inhibits nucleic acid synthesis, hence reducing proliferation of lymphocytes  
47 involved in targeting and amplification of the immune response. It affects both the cell-mediated and  
48 antibody-mediated responses through reducing T and B lymphocyte proliferation.[39] It was selected  
49 over other immunosuppressants because of its established efficacy in a range of clinical conditions,  
50 including central nervous system disorders such as multiple sclerosis,[40] and its acceptable safety  
51  
52  
53  
54  
55  
56  
57  
58  
59  
60

1  
2  
3 profile with recognised protocols for toxicity monitoring. Furthermore, it is generally well tolerated in  
4  
5 the elderly and is a once-daily preparation for ease of administration.  
6  
7

## 8 9 METHODS AND ANALYSIS

### 10 11 12 Overview

13  
14  
15 AZA-PD is a randomised double-blind placebo-controlled trial of azathioprine in early Parkinson's  
16  
17 disease which aims to provide 'proof of concept' that a peripherally acting immunosuppressive drug  
18  
19 can slow clinical disease progression. The trial will investigate whether the drug has an effect on  
20  
21 disease course over 12 months of treatment and whether this is maintained over 6 months of  
22  
23 subsequent follow-up. Sixty participants will be recruited and randomised 1:1 to receive active  
24  
25 treatment or placebo. Clinical assessments will be performed at baseline, 6 months, 12 months and  
26  
27 18 months (6 months post completion of treatment), with rigorous safety monitoring. In addition, the  
28  
29 trial aims to demonstrate 'proof of mechanism' by evaluating the impact of azathioprine on blood,  
30  
31 CSF and neuroimaging parameters of immune activation in the trial population and determining the  
32  
33 relationship between these parameters and clinical measures of disease progression.  
34  
35  
36

37  
38 The trial timeline is summarised in **Error! Reference source not found..**  
39  
40

41  
42 Although AZA-PD is open to recruitment, given the current COVID-19 pandemic, recruitment has not  
43  
44 commenced due to safety concerns. The Trial Steering Committee (TSC) and Data and Safety  
45  
46 Monitoring Board (DSMB) will decide on an appropriate date to begin recruitment in due course, and  
47  
48 protocol amendments to maximise patient safety will be submitted to the appropriate bodies when  
49  
50 the best course of action has been determined. Our current aim is to start recruitment in March 2021,  
51  
52 closing to recruitment in March 2022, with last patient last visit in November 2023, although this may  
53  
54 be subject to change depending on the COVID-19 pandemic.  
55  
56  
57  
58  
59  
60

## Patient and public involvement (PPI)

PD patients and their partners and carers who attend our research clinic at the John van Geest Centre for Brain Repair (VGB), University of Cambridge gave input into the protocol design. A PPI advisory panel of 4 patients/carers reviewed the protocol and provided specific feedback, leading to the addition of optional components. The PPI panel also reviewed our participant information sheet for clarity.

## Participant Identification

Participants will be recruited from a single site in Cambridge, UK. Potential participants will be identified from the PD Research clinic database at the VGB. These individuals have undergone detailed clinical phenotyping, and information on demographics, comorbidities and medication is available. They have consented to be contacted about other research studies. Potential participants will be pre-selected by cross-referencing existing data with the inclusion/exclusion criteria outlined in **Error! Reference source not found.** A key component of this process involves the calculation of a prognostic risk score, based on a model we have previously developed and validated, using age, MDS-UPDRS axial score and semantic fluency to estimate risk of a poor prognosis (dementia, postural instability or death) within 5 years.[41] Only patients with a risk greater than 50%, based on prior assessment at the research clinic, will be invited to take part. Approximately 40% of those on the database fall within this group. This strategy has been adopted to maximise the probability of demonstrating significant slowing of clinical progression with azathioprine treatment.

Potential participants will be sent a copy of the participant information sheet, and telephoned after two weeks to determine whether they are interested in participating. If so, they will attend a screening visit, where written informed consent will be obtained before confirming eligibility.

## Eligibility criteria

A potential participant will be deemed eligible for recruitment into AZA-PD if they meet the inclusion and exclusion criteria listed in **Error! Reference source not found.** A review of medical history and blood tests will be used to determine eligibility.

## Outcome measures

The primary outcome measure is change in MDS-UPDRS gait/axial score in the OFF state over the 12-month treatment period. This is a clinical measure which has been shown to be the most sensitive measure of motor progression in PD, is relatively resistant to dopaminergic therapy and has an important impact on quality of life.[42] This score is a sum of the points from the following sections of MDS-UPDRS part III:

- 3.1 – speech
- 3.2 – facial expression
- 3.9 – rising from a chair
- 3.10 – gait
- 3.12 – postural stability
- 3.13 – posture
- 3.14 – body bradykinesia

Other outcome measures are exploratory and include:

- change in MDS-UPDRS gait/axial score in OFF state at 18 months
- change in total MDS-UPDRS in OFF state at 12 and 18 months
- change in electromagnetic sensor (EMS) measurements whilst performing MDS-UPDRS tremor and bradykinesia assessments at 12 and 18 months

- proportion of patients developing postural instability (Hoehn and Yahr stage 3 or greater) at 12 and 18 months
- change in global cognition (ACE-III) at 12 and 18 months
- change in patient reported outcome measure of quality of life (PDQ-39) at 12 and 18 months
- change in NMSS at 12 and 18 months
- change in dose of symptomatic dopaminergic therapy (LEDD) at 12 and 18 months
- the safety and tolerability of azathioprine assessed by the number of adverse events (AEs) recorded during the 12-month treatment period
- change in [<sup>11</sup>C]-PK11195 PET non- dissociable binding potential (BP<sub>ND</sub>) in subcortical and cortical regions of interest at 12 months
- change in total lymphocyte count at 6, 12 and 18 months
- change in serum immunoglobulin levels at 6, 12 and 18 months
- change in levels of serum and CSF cytokine levels at 12 and 18 months
- change in lymphocyte subsets in blood and CSF at 12 and 18 months

### Sample Size Calculation

The treatment effect size is unknown and therefore cannot be used to inform sample size calculations. A sample size of 60 has been selected pragmatically based on feasibility of recruitment.

However, longitudinal clinical data from the ICICLE-PD cohort study provides some idea of an anticipated effect size for the primary outcome measure. ICICLE-PD patients were stratified by cytokine profile. Those with a 'pro-inflammatory' profile (n=32) had a more rapid symptom progression, with mean (SD) annualised change in MDS-UPDRS gait/axial score of 1.95 (1.92). In the subgroup with an 'anti-inflammatory' cytokine profile (n=26), mean (SD) annualised change in MDS-

1  
2  
3 UPDRS gait/axial score was 0.72 (1.40).[12] The corresponding between group difference of 1.2  
4  
5 points is equivalent to a standardised effect size (Cohen's d) of 0.73. The magnitude this effect,  
6  
7 which equates to a 4% change on the 28-point gait-axial MDS-UPDRS subscale, would be clinically  
8  
9 significant. For comparison, the estimated minimum clinically important change on the full 132-point  
10  
11 MDS-UPDRS motor scale is  $\approx$ 2% (2.5 points).[43] Furthermore, the axial-gait items of the MDS-UPDRS  
12  
13 are those with the greatest impact on quality of life.[42]  
14  
15

16  
17 As this is an early-phase proof of concept trial, it is important to maximise the chances of continuing  
18  
19 development if the treatment is genuinely effective, and thus a significance level of 25% under a 1-  
20  
21 sided test will be used. If the treatment effect is a 2% change (0.37 standardised effect), the design  
22  
23 has 78% power, and for a 4% change (0.73 standardised effect), the design has 99% power.  
24  
25  
26  
27  
28  
29

## 30 Trial procedures

### 31 Clinical

32  
33  
34  
35  
36 Clinical measures assessing both motor and non-motor components of PD will be performed at  
37  
38 baseline, mid-treatment, end-of-treatment and after 6-months further follow-up (see **Error!**  
39  
40 **Reference source not found.**). Throughout the course of the trial participants will continue to take  
41  
42 their PD medication as prescribed by their treating physician, and dose adjustments are permitted.  
43  
44 However, some assessments will be conducted 'OFF' medication.  
45  
46  
47

48  
49 The Movement Disorder Society-Unified Parkinson's Disease Rating Scale (MDS-UPDRS) is widely  
50  
51 used to quantify PD severity and includes questionnaires assessing the non-motor and motor  
52  
53 aspects of the disease, a motor examination performed by a clinician and an assessment of motor  
54  
55 complications (dyskinesias and fluctuations).[44] The MDS-UPDRS part III will be assessed in the OFF  
56  
57 state; in the absence of regular dopaminergic medication, with participants being asked to not take  
58  
59 their levodopa in the eight hours prior to the assessment or their long acting agents (e.g. ropinirole,  
60



1  
2  
3 pramipexole, rasagiline) in the preceding 36 hours. The aim of this is to expose underlying disease  
4 severity and avoid confounding effects from variability in medication doses or timing. This  
5 examination will be filmed to enable subsequent rating by an independent assessor to check inter-  
6 rater reliability. Our primary outcome measure is derived from the MDS-UPDRS: the gait-axial sub-  
7 score, as previously discussed. Two sections of the MDS-UPDRS part III (tremor and bradykinesia)  
8 will be repeated whilst the participant is wearing an electromagnetic sensor (EMS, Polhemus Inc.) on  
9 the index finger and thumb, which will give an objective measure of the participant's movements.  
10 Motor stage will also be evaluated using the Hoehn and Yahr scale, a 5-point scale used to capture  
11 the stages of progression of PD, with stage 3 representing the development of postural  
12 instability.[45]

13  
14  
15  
16  
17  
18  
19  
20  
21  
22  
23  
24  
25  
26 Cognition will be assessed using the Addenbrooke's Cognitive Examination-III (ACE-III). This provides  
27 a global measure of cognition as well as sub-scores in 5 domains; attention, memory, fluency,  
28 language and visuospatial function.[46] Other non-motor aspects of PD will be evaluated using the  
29 short form 15-item Geriatric Depression Scale (GDS), a questionnaire assessing depressive symptoms  
30 filled in by the participant,[47] and the Parkinson's disease Non-Motor Symptom Scale (NMSS),  
31 completed by the trial assessor.[48] Finally, we will use the Parkinson's Disease Questionnaire 39  
32 (PDQ-39), a self-rated questionnaire measuring PD-related quality of life.[49]

33  
34  
35  
36  
37  
38  
39  
40  
41  
42  
43  
44 Dopaminergic medication requirement will be monitored throughout the trial, and standardised by  
45 calculating Levodopa Equivalent Daily Dose (LEDD), which allows quantification of different doses and  
46 types of Parkinson's medication on a single scale.[50]

#### 51 52 53 PK-11195 PET imaging

54  
55  
56 [11C]-PK11195 PET will be used to measure activated microglia in the brain.[17, 18] Scanning will be  
57 conducted at the Wolfson Brain Imaging Centre (WBIC) on a GE SIGNA PET/MRI scanner, with the  
58  
59  
60

1  
2  
3 radiotracer produced at the WBIC Radiopharmaceutical Chemistry laboratory. MRI will be used for  
4  
5 co-localisation. 500 MBq of the [<sup>11</sup>C]-PK11195 radiotracer will be injected via a peripheral venous  
6  
7 cannula over 30 seconds and PET emission data will be acquired for 75 min post-injection in 55 time  
8  
9 frames. Following image reconstruction and attenuation correction, specific tracer binding will be  
10  
11 analysed with the simplified reference tissue model (SRTM; [51]) to quantify binding potential  
12  
13 relative to a non-displaceable compartment (BPND). The reference region will be estimated with  
14  
15 supervised cluster analysis for [<sup>11</sup>C]PK11195 from existing scans in healthy controls acquired on the  
16  
17 same scanner. BPND will be compared pre and post treatment using a region of interest approach.  
18  
19  
20  
21 Given that some participants may have difficulty tolerating prolonged PET imaging, this will be  
22  
23 optional. It will be performed between screening and baseline, and repeated within 3 months  
24  
25 following the end of treatment.  
26  
27

### 28 29 Biosample collection and processing 30

31  
32 14 mls of blood will be collected in serum tubes at baseline, mid-treatment, end-of-treatment and  
33  
34 follow-up visits for analysis of inflammatory cytokines, CRP and immunoglobulins. Tubes will be  
35  
36 centrifuged at 2000RPM (600G) for 15 mins following 15 minutes clotting time for extraction of  
37  
38 serum. Aliquots will be stored at -80°C for subsequent batch analysis using ELISA and  
39  
40 electrochemiluminescence assays.  
41  
42

43  
44 At baseline, end-of-treatment and follow-up visits an additional 27mls of blood will be collected in  
45  
46 lithium heparin tubes for separation of peripheral blood mononuclear cells (PBMCs) for  
47  
48 immunophenotyping. A concurrent full blood count (FBC) will be performed from an EDTA sample  
49  
50 (2.6mls).  
51

52  
53 CSF will be collected via lumbar puncture before the baseline visit and at the treatment endpoint.  
54  
55 This is an optional component of the study in order to ensure that its inclusion does not limit  
56  
57 recruitment. CSF will be spun at 400G for 10 minutes for extraction of immune cells for  
58  
59  
60

1  
2  
3 contemporaneous immunophenotyping alongside PBMC analysis. Supernatants will be stored at -  
4  
5 80°C for later batch analysis of relevant immune and protein markers. Immunophenotyping will be  
6  
7 performed for subsets of T cells, B cells and monocytes using flow cytometry, run within 24 hours of  
8  
9 sample collection.  
10  
11  
12  
13  
14  
15  
16  
17  
18  
19  
20  
21  
22  
23  
24  
25  
26  
27  
28  
29  
30  
31  
32  
33  
34  
35  
36  
37  
38  
39  
40  
41  
42  
43  
44  
45  
46  
47  
48  
49  
50  
51  
52  
53  
54  
55  
56  
57  
58  
59  
60

For peer review only

Table 1: Schedule of Assessments

|                      | Screening Visit               | Imaging Visit    | CSF Collection  | Baseline Visit | Monitoring Visits <sup>1</sup> | Dose escalation Visit | Mid-Treatment Visit | End of Treatment Visit | Imaging Visit | Follow-up Visit |
|----------------------|-------------------------------|------------------|-----------------|----------------|--------------------------------|-----------------------|---------------------|------------------------|---------------|-----------------|
|                      | Day -42 (max)                 | Approx. Day -14± | Approx. Day -7± | Day 0± 14      | Day 14 ± 5 and onwards         | Day 28± 5             | Day 182± 14         | Day 365± 14            | Day 410± 45   | Day 547±14      |
|                      | Informed written consent      | ✓                |                 |                |                                |                       |                     |                        |               |                 |
|                      | Eligibility review            | ✓                |                 |                |                                |                       |                     |                        |               |                 |
|                      | Randomisation                 |                  |                 | ✓              |                                |                       |                     |                        |               |                 |
|                      | Vital Signs                   |                  |                 | ✓              | ✓                              | ✓                     | ✓                   | ✓                      |               | ✓               |
|                      | Weight in kg                  | ✓                |                 | ✓              | ✓                              | ✓                     | ✓                   |                        |               |                 |
| Clinical Assessments | Demographics                  |                  |                 | ✓              |                                |                       |                     |                        |               |                 |
|                      | Medical history               | ✓                |                 | ✓              | ✓                              | ✓                     | ✓                   | ✓                      |               | ✓               |
|                      | Concomitant medication review | ✓                |                 | ✓              | ✓                              | ✓                     | ✓                   | ✓                      |               | ✓               |
|                      | MDS-UPDRS                     |                  |                 | ✓              |                                |                       | ✓                   | ✓                      |               | ✓               |
|                      | NART                          |                  |                 | ✓              |                                |                       |                     |                        |               |                 |
|                      | ACE III                       |                  |                 | ✓              |                                |                       | ✓                   | ✓                      |               | ✓               |
|                      | GDS                           |                  |                 | ✓              |                                |                       | ✓                   | ✓                      |               | ✓               |
|                      | NMSS                          |                  |                 | ✓              |                                |                       | ✓                   | ✓                      |               | ✓               |
|                      | PDQ-39                        |                  |                 | ✓              |                                |                       | ✓                   | ✓                      |               | ✓               |
|                      | Adverse events review         | ✓                | ✓               | ✓              | ✓                              | ✓                     | ✓                   | ✓                      | ✓             | ✓               |
| IMP compliance check |                               |                  |                 |                | ✓                              | ✓                     | ✓                   | ✓                      |               |                 |

|                  |                                                                 |   |   |   |   |   |   |   |   |   |
|------------------|-----------------------------------------------------------------|---|---|---|---|---|---|---|---|---|
| Imaging-Optional | [11C]-PK11195 PET-MRI                                           |   | ✓ |   |   |   |   |   | ✓ |   |
| Blood tests      | Screening bloods <sup>2</sup>                                   | ✓ |   |   |   |   |   |   |   |   |
|                  | Safety monitoring bloods <sup>3</sup>                           |   |   |   | ✓ | ✓ | ✓ | ✓ |   | ✓ |
|                  | CRP, immunoglobulins and serum storage for cytokine measurement |   |   | ✓ |   |   | ✓ | ✓ |   | ✓ |
|                  | Immunophenotyping                                               |   |   | ✓ |   |   |   | ✓ |   | ✓ |
| CSF-optional     | Immune markers and immunophenotyping                            |   |   | ✓ |   |   |   | ✓ |   |   |

<sup>1</sup> Monitoring visits will take place at: day 14, day 42, day 56, day 70, day 98, day 252 and day 547 (as part of the routine follow-up visit). Additional monitoring visits may also be scheduled if there are patient safety concerns.

<sup>2</sup>Screening bloods include FBC, U&Es, LFTs, coagulation, TPMT, HIV, Syphilis, HepB, HepC, EBV serology, VZV serology, LH and FSH (if female and reproductive age)

<sup>3</sup>Monitoring bloods include FBC, U&Es, LFTs

### Treatment allocation, blinding and safety monitoring

Participants will be randomised 1:1 to receive azathioprine or placebo using Sealed Envelope, an online randomisation system. Clinical assessors and participants will be blinded to treatment allocation. Balanced assignment of each treatment will be achieved using permuted block randomisation, which will be stratified for: age  $\leq 71$  vs  $> 71$ , and MDS-UPDRS-III  $\leq 30$  vs  $> 30$ .

Treatment will be commenced at a dose of 1mg/kg, based on 25mg tablets of IMP (azathioprine/placebo). In addition to the visits shown in *Figure 1*, treatment monitoring visits will be conducted to screen for potential complications associated with azathioprine. These will include blood tests to screen for myelosuppression, liver or renal dysfunction, adverse events reporting and assessment of treatment compliance (review of patient-completed dosing diary and counting of IMP at regular intervals). Initially, monitoring visits will occur 2 weekly, and after 4 weeks, the azathioprine dose will be increased to 2mg/kg (assuming blood tests and clinical assessments are satisfactory), the standard therapeutic dose used in clinical practice. There will be a matched doubling of the placebo dose to maintain blinding. Once the participant is stable on their dose, treatment monitoring will be carried out less frequently (see monitoring protocol, *Figure 3*).

Given that azathioprine will produce changes in FBC parameters, the blinded trial team conducting patient assessments and laboratory analysis will not have access to monitoring blood results throughout the duration of the trial. The blood tests will be reviewed by a separate unblinded team of clinicians, who will make decisions on dose changes when necessary. If a dose reduction is required, the participant will have an additional 3 monitoring visits at 2-weekly intervals to ensure stability of blood tests. Dose reductions and, where necessary, withdrawal of treatment will be carried out based on pre-defined clinical and laboratory criteria to ensure the safety of participants, including the development of significant myelosuppression, intolerable gastrointestinal side effects and hypersensitivity reactions. Participants who have been withdrawn from treatment will be encouraged to continue to attend the remainder of the trial assessments.

1  
2  
3 To ensure blinding is maintained amongst clinical assessors and participants, dose adjustments and  
4 treatment withdrawals will be also made for an equal number of participants in the placebo arm,  
5  
6 with additional monitoring visits. Matched pairs of placebo and azathioprine-treated participants will  
7  
8 be generated to facilitate this, and all dose adjustment decisions will be made by the unblinded  
9  
10  
11  
12 team.

13  
14  
15 Emergency unblinding will be carried out in the event of a valid medical or safety reason, where the  
16  
17 clinical care of the participant will be facilitated by the knowledge of whether they have been taking  
18  
19 azathioprine, as decided by the treating clinician. It will be executed using Sealed Envelope, and  
20  
21 where possible the trial team will remain blinded.

22  
23  
24 Following the end of the trial, and for participants who withdraw early, we will offer continuing  
25  
26 follow-up through our research clinic at the VGB.  
27  
28  
29  
30  
31  
32

### 33 **Trial monitoring and oversight**

34  
35  
36 Safety monitoring will be overseen by a DSMB who will have access to interim recruitment and safety  
37  
38 data. The DSMB will report to the TSC should it become clear that one treatment allocation is either  
39  
40 indicated or contraindicated, or apparent that no clear outcome can be obtained from the trial. The  
41  
42 TSC, who are independent from the Sponsor, will provide overall supervision of the trial and ensure  
43  
44 that it meets appropriate standards. These groups include clinicians with experience in PD or  
45  
46 immunosuppression, independent statisticians, and the TSC includes a lay member.  
47  
48  
49  
50

51  
52 AZA-PD is jointly sponsored by Cambridge University Hospitals NHS Foundation Trust and the  
53  
54 University of Cambridge. The Sponsor will review all trial documentation, including any proposed  
55  
56 amendments, prior to submission to the relevant regulatory bodies, which can only be completed  
57  
58  
59  
60

1  
2  
3 once the Sponsor has approved the changes. Changes will then be communicated to participants,  
4  
5 the DMSB, TSC, and trial registries.  
6  
7  
8  
9

10 Adherence to the protocol and regulatory requirements will be reviewed by a Clinical Trials Monitor,  
11  
12 assigned by the Sponsor. The first monitoring visit will occur within 10 days of the first randomisation,  
13  
14 with frequency thereafter determined by a risk assessment which will be reviewed and adjusted as  
15  
16 necessary throughout the course of the trial.  
17  
18  
19  
20

## 21 **Data Analysis**

22  
23  
24 Trial data will be transferred from paper CRFs to the electronic trial database, where it will be  
25  
26 anonymised, but with preserved linkage records. Patient-identifiable data (PID), will be stored on a  
27  
28 password-protected database within the SDHS hosted by the University of Cambridge, with access  
29  
30 granted only to relevant members of the trial team. PID will be kept for 5 years following the end of  
31  
32 the trial, as per regulatory requirements. Participant consent will be specifically sought for  
33  
34 data/sample sharing with our collaborators, and use of remaining biological samples in future  
35  
36 ethically-approved research.  
37  
38  
39  
40

41 Data will be analysed on an “intention to treat” basis, with further “per protocol” analysis in  
42  
43 participants with at least 80% compliance with trial medication. All endpoints will be summarised and  
44  
45 broken down by treatment group and time point, where relevant. Mean, median, standard deviation,  
46  
47 minimum/maximum will be used for continuous endpoints, and frequency tables for categorical or  
48  
49 binary endpoints. Equivalent box and whisker plots or stacked bar charts will be produced for  
50  
51 continuous and categorical endpoints respectively.  
52  
53  
54

55 The primary analysis will estimate the difference between treatment groups in terms of the primary  
56  
57 endpoint. An analysis of covariance (ANCOVA) model will be fitted adjusting for baseline MDS-UPDRS  
58  
59 gait/axial score, gender, LEDD, and age. Treatment effect estimates, standard errors, confidence  
60



1  
2  
3 intervals (95% and 40% levels) and 1-sided p-values will be provided. A 1-sided p-value less than 25%  
4  
5 will be regarded as statistically significant. Similar comparative analyses will be produced for other  
6  
7 time points of the MDS-UPDRS gait/axial score and exploratory endpoints, using ANCOVA for  
8  
9 continuous endpoints or logistic regression for categorical or binary endpoints.  
10

11  
12 Longitudinal data will use a mixed effect model repeated measurements (MMRM) analysis, to include  
13  
14 an unstructured patient-level random effect for nominal visit, visit and visit-treatment interaction  
15  
16 fixed effects at visits post-baseline, with adjustment for baseline covariates. To assess the slope of  
17  
18 change over time, the longitudinal data will be analysed using a similar MMRM but with a fixed effect  
19  
20 of time from randomisation as a continuous, rather than nominal covariate, with a treatment-time  
21  
22 interaction to compare treatment groups and patient-level random effect for slope, with adjustment  
23  
24 for baseline covariates.  
25  
26  
27  
28  
29  
30  
31

## 32 **ETHICS AND DISSEMINATION**

33  
34  
35 This study was approved by the London-Westminster research ethics committee (reference  
36  
37 19/LO/1705) and has been accepted by the MHRA for a clinical trials authorisation (reference CTA  
38  
39 12854/0248/001-0001). In addition, approval has been granted from the Administration of  
40  
41 radioactive substances advisory committee (ARSAC).  
42  
43  
44

45 We will feedback trial results to participants and our wider cohort of research participants via our  
46  
47 annual PD Open Day and newsletter. A lay summary of the results will be available on our website.

48  
49 The results will also be disseminated through publication in scientific journals and presentation at  
50  
51 national and international conferences.  
52

53  
54 AZA-PD has been accepted onto the NIHR Clinical Research Network (CRN) portfolio and details of  
55  
56 this trial are also available on the following registries: ISRCTN14616801, EudraCT- 2018-003089-14.  
57  
58  
59  
60

## REFERENCES

1. Williams-Gray CH, Mason SL, Evans JR, et al. The CamPaIGN study of Parkinson's disease: 10-year outlook in an incident population-based cohort. *Journal of neurology, neurosurgery, and psychiatry* 2013;84(11):1258-64. doi: 10.1136/jnnp-2013-305277 [published Online First: 2013/06/20]
2. Schrag A, Jahanshahi M, Quinn N. What contributes to quality of life in patients with Parkinson's disease? *Journal of neurology, neurosurgery, and psychiatry* 2000;69(3):308-12. [published Online First: 2000/08/17]
3. Evans JR, Mason SL, Williams-Gray CH, et al. The natural history of treated Parkinson's disease in an incident, community based cohort. *Journal of neurology, neurosurgery, and psychiatry* 2011;82(10):1112-8. doi: 10.1136/jnnp.2011.240366 [published Online First: 2011/05/20]
4. Aarsland D, Larsen JP, Tandberg E, et al. Predictors of nursing home placement in Parkinson's disease: a population-based, prospective study. *Journal of the American Geriatrics Society* 2000;48(8):938-42. [published Online First: 2000/09/01]
5. Saiki M, Baker A, Williams-Gray CH, et al. Association of the human leucocyte antigen region with susceptibility to Parkinson's disease. *Journal of neurology, neurosurgery, and psychiatry* 2010;81(8):890-1. doi: 10.1136/jnnp.2008.162883 [published Online First: 2010/05/14]
6. International Parkinson Disease Genomics Consortium, Nalls MA, Plagnol V, et al. Imputation of sequence variants for identification of genetic risks for Parkinson's disease: a meta-analysis of genome-wide association studies. *Lancet* 2011;377(9766):641-9.
7. Gagliano SA, Pouget JG, Hardy J, et al. Genomics implicates adaptive and innate immunity in Alzheimer's and Parkinson's diseases. *Annals of clinical and translational neurology* 2016;3(12):924-33. doi: 10.1002/acn3.369 [published Online First: 2017/01/18]

- 1  
2  
3  
4 8. Holmans P, Moskvina V, Jones L, et al. A pathway-based analysis provides  
5 additional support for an immune-related genetic susceptibility to  
6 Parkinson's disease. *Human molecular genetics* 2013;22(5):1039-49.  
7 doi: 10.1093/hmg/dds492 [published Online First: 2012/12/12]  
8  
9  
10
- 11 9. Gao X, Chen H, Schwarzschild MA, et al. Use of ibuprofen and risk of  
12 Parkinson disease. *Neurology* 2011;76(10):863-9. doi:  
13 10.1212/WNL.0b013e31820f2d79 [published Online First: 2011/03/04]  
14  
15  
16
- 17 10. Chen H, Zhang SM, Hernan MA, et al. Nonsteroidal anti-inflammatory  
18 drugs and the risk of Parkinson disease. *Archives of neurology*  
19 2003;60(8):1059-64. doi: 10.1001/archneur.60.8.1059 [published Online  
20 First: 2003/08/20]  
21  
22  
23
- 24 11. Racette BA, Gross A, Vouri SM, et al. Immunosuppressants and risk of  
25 Parkinson disease. *Annals of clinical and translational neurology*  
26 2018;5(7):870-75. doi: 10.1002/acn3.580 [published Online First:  
27 2018/07/17]  
28  
29  
30  
31
- 32 12. Williams-Gray CH, Wijeyekoon R, Yarnall AJ, et al. Serum immune  
33 markers and disease progression in an incident Parkinson's disease  
34 cohort (ICICLE-PD). *Movement disorders : official journal of the*  
35 *Movement Disorder Society* 2016;31(7):995-1003. doi:  
36 10.1002/mds.26563  
37  
38  
39  
40
- 41 13. McGeer PL, Itagaki S, Boyes BE, et al. Reactive microglia are positive for  
42 HLA-DR in the substantia nigra of Parkinson's and Alzheimer's disease  
43 brains. *Neurology* 1988;38(8):1285-91. [published Online First:  
44 1988/08/01]  
45  
46  
47  
48
- 49 14. Mogi M, Harada M, Kondo T, et al. Interleukin-1 beta, interleukin-6,  
50 epidermal growth factor and transforming growth factor-alpha are  
51 elevated in the brain from parkinsonian patients. *Neuroscience letters*  
52 1994;180(2):147-50. [published Online First: 1994/10/24]  
53  
54  
55
- 56 15. Loeffler DA, Camp DM, Conant SB. Complement activation in the  
57 Parkinson's disease substantia nigra: an immunocytochemical study.  
58  
59  
60

- 1  
2  
3  
4 *Journal of neuroinflammation* 2006;3:29. doi: 10.1186/1742-2094-3-29  
5 [published Online First: 2006/10/21]  
6  
7 16. Brochard V, Combadiere B, Prigent A, et al. Infiltration of CD4+  
8 lymphocytes into the brain contributes to neurodegeneration in a mouse  
9 model of Parkinson disease. *The Journal of clinical investigation*  
10 2009;119(1):182-92. doi: 10.1172/jci36470 [published Online First:  
11 2008/12/24]  
12  
13 17. Gerhard A, Pavese N, Hotton G, et al. In vivo imaging of microglial  
14 activation with [11C](R)-PK11195 PET in idiopathic Parkinson's  
15 disease. *Neurobiology of disease* 2006;21(2):404-12. doi:  
16 10.1016/j.nbd.2005.08.002 [published Online First: 2005/09/27]  
17  
18 18. Ouchi Y, Yoshikawa E, Sekine Y, et al. Microglial activation and dopamine  
19 terminal loss in early Parkinson's disease. *Annals of neurology*  
20 2005;57(2):168-75. doi: 10.1002/ana.20338 [published Online First:  
21 2005/01/26]  
22  
23 19. Edison P, Ahmed I, Fan Z, et al. Microglia, amyloid, and glucose  
24 metabolism in Parkinson's disease with and without dementia.  
25 *Neuropsychopharmacology : official publication of the American College*  
26 *of Neuropsychopharmacology* 2013;38(6):938-49. doi:  
27 10.1038/npp.2012.255 [published Online First: 2013/01/11]  
28  
29 20. Perry VH. Innate inflammation in Parkinson's disease. *Cold Spring Harbor*  
30 *perspectives in medicine* 2012;2(9):a009373. doi:  
31 10.1101/cshperspect.a009373 [published Online First: 2012/09/07]  
32  
33 21. Gao HM, Hong JS. Why neurodegenerative diseases are progressive:  
34 uncontrolled inflammation drives disease progression. *Trends in*  
35 *immunology* 2008;29(8):357-65. doi: 10.1016/j.it.2008.05.002 [published  
36 Online First: 2008/07/05]  
37  
38 22. Grozdanov V, Bliederaeuser C, Ruf WP, et al. Inflammatory  
39 dysregulation of blood monocytes in Parkinson's disease patients. *Acta*  
40 *neuropathologica* 2014;128(5):651-63. doi: 10.1007/s00401-014-1345-4  
41  
42  
43  
44  
45  
46  
47  
48  
49  
50  
51  
52  
53  
54  
55  
56  
57  
58  
59  
60

- 1  
2  
3  
4 23. Wijeyekoon RS, Kronenberg-Versteeg D, Scott KM, et al. Peripheral  
5 innate immune and bacterial signals relate to clinical heterogeneity in  
6 Parkinson's disease. *Brain, behavior, and immunity* 2020 doi:  
7 10.1016/j.bbi.2020.01.018 [published Online First: 2020/02/02]  
8  
9  
10  
11 24. Kustrimovic N, Comi C, Magistrelli L, et al. Parkinson's disease patients  
12 have a complex phenotypic and functional Th1 bias: cross-sectional  
13 studies of CD4+ Th1/Th2/T17 and Treg in drug-naive and drug-treated  
14 patients. *Journal of neuroinflammation* 2018;15(1):205. doi:  
15 10.1186/s12974-018-1248-8 [published Online First: 2018/07/14]  
16  
17  
18  
19 25. Sommer A, Maxreiter F, Krach F, et al. Th17 Lymphocytes Induce  
20 Neuronal Cell Death in a Human iPSC-Based Model of Parkinson's  
21 Disease. *Cell stem cell* 2018;23(1):123-31.e6. doi:  
22 10.1016/j.stem.2018.06.015 [published Online First: 2018/07/07]  
23  
24  
25  
26 26. Saunders JA, Estes KA, Kosloski LM, et al. CD4+ regulatory and  
27 effector/memory T cell subsets profile motor dysfunction in Parkinson's  
28 disease. *Journal of neuroimmune pharmacology : the official journal of*  
29 *the Society on NeuroImmune Pharmacology* 2012;7(4):927-38. doi:  
30 10.1007/s11481-012-9402-z  
31  
32  
33  
34 27. Baba Y, Kuroiwa A, Uitti RJ, et al. Alterations of T-lymphocyte populations  
35 in Parkinson disease. *Parkinsonism & related disorders* 2005;11(8):493-  
36 8. doi: 10.1016/j.parkreldis.2005.07.005 [published Online First:  
37 2005/09/13]  
38  
39  
40  
41 28. Williams-Gray CH, Wijeyekoon RS, Scott KM, et al. Abnormalities of age-  
42 related T cell senescence in Parkinson's disease. *Journal of*  
43 *Neuroinflammation* 2018;15:166. doi: 10.1186/s12974-018-1206-5  
44  
45  
46  
47 29. Sulzer D, Alcalay RN, Garretti F, et al. T cells from patients with  
48 Parkinson's disease recognize alpha-synuclein peptides. *Nature*  
49 2017;546(7660):656-61. doi: 10.1038/nature22815 [published Online  
50 First: 2017/06/22]  
51  
52  
53  
54  
55  
56  
57  
58  
59  
60

- 1  
2  
3  
4 30. Scott KM, Kouli A, Yeoh SL, et al. A Systematic Review and Meta-  
5 Analysis of Alpha Synuclein Auto-Antibodies in Parkinson's Disease.  
6 *Frontiers in neurology* 2018;9:815. doi: 10.3389/fneur.2018.00815  
7 [published Online First: 2018/10/20]  
8  
9  
10  
11 31. Schroder JB, Pawlowski M, Meyer Zu Horste G, et al. Immune Cell  
12 Activation in the Cerebrospinal Fluid of Patients With Parkinson's  
13 Disease. *Frontiers in neurology* 2018;9:1081. doi:  
14 10.3389/fneur.2018.01081 [published Online First: 2019/01/09]  
15  
16  
17 32. Reynolds AD, Stone DK, Hutter JA, et al. Regulatory T cells attenuate  
18 Th17 cell-mediated nigrostriatal dopaminergic neurodegeneration in a  
19 model of Parkinson's disease. *Journal of immunology (Baltimore, Md :  
20 1950)* 2010;184(5):2261-71. doi: 10.4049/jimmunol.0901852 [published  
21 Online First: 2010/02/02]  
22  
23  
24 33. Harms AS, Cao S, Rowse AL, et al. MHCII is required for alpha-synuclein-  
25 induced activation of microglia, CD4 T cell proliferation, and  
26 dopaminergic neurodegeneration. *The Journal of neuroscience : the  
27 official journal of the Society for Neuroscience* 2013;33(23):9592-600.  
28 doi: 10.1523/jneurosci.5610-12.2013 [published Online First:  
29 2013/06/07]  
30  
31  
32 34. Tamburrino A, Churchill MJ, Wan OW, et al. Cyclosporin promotes  
33 neurorestoration and cell replacement therapy in pre-clinical models of  
34 Parkinson's disease. *Acta neuropathologica communications* 2015;3:84.  
35 doi: 10.1186/s40478-015-0263-6 [published Online First: 2015/12/17]  
36  
37  
38 35. Investigators NN-P. A pilot clinical trial of creatine and minocycline in early  
39 Parkinson disease: 18-month results. *Clin Neuropharmacol*  
40 2008;31(3):141-50. doi:  
41 https://dx.doi.org/10.1097/WNF.0b013e3181342f32  
42  
43  
44 36. NINDS Net-Pd Investigators. A randomized, double-blind, futility clinical  
45 trial of creatine and minocycline in early Parkinson disease. *Neurology*  
46 2006;66(5):664-71. doi: 10.1212/01.wnl.0000201252.57661.e1  
47  
48  
49  
50  
51  
52  
53  
54  
55  
56  
57  
58  
59  
60



- 1  
2  
3  
4 37. Investigators NETiPDF-Z. Pioglitazone in early Parkinson's disease: a  
5 phase 2, multicentre, double-blind, randomised trial.[Erratum appears in  
6 Lancet Neurol. 2015 Oct; 14(10):979]. *Lancet neurol* 2015;14(8):795-  
7 803. doi: [https://dx.doi.org/10.1016/S1474-4422\(15\)00144-1](https://dx.doi.org/10.1016/S1474-4422(15)00144-1)  
8  
9  
10  
11 38. Gendelman HE, Zhang Y, Santamaria P, et al. Evaluation of the safety  
12 and immunomodulatory effects of sargramostim in a randomized,  
13 double-blind phase 1 clinical Parkinson's disease trial. *NPJ Parkinson's*  
14 *disease* 2017;3:10. doi: 10.1038/s41531-017-0013-5 [published Online  
15 First: 2017/06/27]  
16  
17  
18  
19  
20 39. Lennard L. The clinical pharmacology of 6-mercaptopurine. *European*  
21 *journal of clinical pharmacology* 1992;43(4):329-39. doi:  
22 10.1007/bf02220605 [published Online First: 1992/01/01]  
23  
24  
25 40. Casetta I, Iuliano G, Filippini G. Azathioprine for multiple sclerosis. *The*  
26 *Cochrane database of systematic reviews* 2007(4):Cd003982. doi:  
27 10.1002/14651858.CD003982.pub2 [published Online First:  
28 2007/10/19]  
29  
30  
31  
32 41. Velseboer DC, de Bie RM, Wieske L, et al. Development and external  
33 validation of a prognostic model in newly diagnosed Parkinson disease.  
34 *Neurology* 2016;86(11):986-93. doi: 10.1212/wnl.0000000000002437  
35 [published Online First: 2016/02/19]  
36  
37  
38 42. Evans JR, Mason SL, Williams-Gray CH, et al. The factor structure of the  
39 UPDRS as an index of disease progression in Parkinson's disease.  
40 *Journal of Parkinson's disease* 2011;1(1):75-82. doi: 10.3233/jpd-2011-  
41 0002 [published Online First: 2011/01/01]  
42  
43  
44 43. Shulman LM, Gruber-Baldini AL, Anderson KE, et al. The clinically  
45 important difference on the unified Parkinson's disease rating scale.  
46 *Archives of neurology* 2010;67(1):64-70. doi:  
47 10.1001/archneurol.2009.295  
48  
49  
50 44. Goetz CG, Tilley BC, Shaftman SR, et al. Movement Disorder Society-  
51 sponsored revision of the Unified Parkinson's Disease Rating Scale  
52  
53  
54  
55  
56  
57  
58  
59  
60

- (MDS-UPDRS): scale presentation and clinimetric testing results. *Movement disorders : official journal of the Movement Disorder Society* 2008;23(15):2129-70. doi: 10.1002/mds.22340
45. Hoehn MM, Yahr MD. Parkinsonism: onset, progression and mortality. *Neurology* 1967;17(5):427-42. [published Online First: 1967/05/01]
46. Hsieh S, Schubert S, Hoon C, et al. Validation of the Addenbrooke's Cognitive Examination III in frontotemporal dementia and Alzheimer's disease. *Dementia and geriatric cognitive disorders* 2013;36(3-4):242-50. doi: 10.1159/000351671 [published Online First: 2013/08/21]
47. Sheikh JI YJ. Geriatric Depression Scale (GDS): recent evidence and development of a shorter version. *Clin Gerontol* 1986;5(June):165-73.
48. Chaudhuri KR, Martinez-Martin P, Brown RG, et al. The metric properties of a novel non-motor symptoms scale for Parkinson's disease: Results from an international pilot study. *Movement disorders : official journal of the Movement Disorder Society* 2007;22(13):1901-11. doi: 10.1002/mds.21596
49. Jenkinson C, Fitzpatrick R, Peto V, et al. The Parkinson's Disease Questionnaire (PDQ-39): development and validation of a Parkinson's disease summary index score. *Age and ageing* 1997;26(5):353-7. [published Online First: 1997/11/14]
50. Tomlinson CL, Stowe R, Patel S, et al. Systematic review of levodopa dose equivalency reporting in Parkinson's disease. *Movement disorders : official journal of the Movement Disorder Society* 2010;25(15):2649-53. doi: 10.1002/mds.23429 [published Online First: 2010/11/12]
51. Lammertsma AA, Hume SP. Simplified reference tissue model for PET receptor studies. *NeuroImage* 1996;4(3 Pt 1):153-8. doi: 10.1006/nimg.1996.0066 [published Online First: 1996/12/01]



## Acknowledgements

This research was supported by the National Institute for Health Research (NIHR) Cambridge Biomedical Research Centre and the Cambridge Clinical Trials Unit (CCTU).

## Authors' Contributions

CWG is the CI of this trial. JG is sub-investigator of this trial.

CWG and JG – study design and writing the protocol.

SK, EC and AC – critical review of the protocol.

SB - statistical analysis plan.

## Sponsorship

This study is jointly sponsored by the University of Cambridge and Cambridge University Hospitals NHS foundation Trust.

Contact:

Ms Carrie Bayliss

Cambridge Clinical Trials Unit

Cambridge University Hospitals NHSFT

Hills Road

Cambridge

CB2 0QQ

E-mail: [cctu@addenbrookes.nhs.uk](mailto:cctu@addenbrookes.nhs.uk)

## Funding Statement

This trial is funded by Cambridge Centre for Parkinson-Plus (grant no: RG95450) and the Cure Parkinson's Trust (grant ref CW011), and supported by the NIHR Cambridge Biomedical Research Centre (grant ref no 146281). CHWG is supported by a RCUK/UKRI Research Innovation Fellowship awarded by the Medical Research Council (MR/R007446/1).

The funders have no role in study design; collection, management, analysis, and interpretation of data; writing of the report; or the decision to submit the report for publication.

## Competing Interests Statement

None declared

1  
2  
3 **TABLE OF FIGURES**  
4  
5

6 Figure 1: Overview of trial timeline  
7

8  
9 Figure 2: AZA-PD eligibility criteria  
10

11  
12 Figure 3: Treatment monitoring schedule  
13  
14  
15  
16  
17  
18  
19  
20  
21  
22  
23  
24  
25  
26  
27  
28  
29  
30  
31  
32  
33  
34  
35  
36  
37  
38  
39  
40  
41  
42  
43  
44  
45  
46  
47  
48  
49  
50  
51  
52  
53  
54  
55  
56  
57  
58  
59  
60

For peer review only

1  
2  
3  
4  
5  
6  
7  
8  
9  
10  
11  
12  
13  
14  
15  
16  
17  
18  
19  
20  
21  
22  
23  
24  
25  
26  
27  
28  
29  
30  
31  
32  
33  
34  
35  
36  
37  
38  
39  
40  
41  
42  
43  
44  
45  
46  
47  
48  
49  
50  
51  
52  
53  
54  
55  
56  
57  
58  
59  
60



*Inclusion Criteria*

- be capable of giving signed informed consent
- be aged over 50 years
- be a fluent English speaker
- have a diagnosis of PD according to UKPDS Brain Bank Criteria
- have a disease duration of less than 3 years
- have a probability of poor outcome (postural instability/dementia/death) at 5 years from diagnosis  $\geq 50\%$  [41]
- have adequate organ and marrow function, as defined below (measured within 42 days of first dose of trial medication):
  - Haemoglobin  $\geq 110$  g/L
  - Platelet count  $\geq 130 \times 10^9/L$
  - Neutrophil count  $\geq 1.5 \times 10^9/L$
  - Renal function- creatinine clearance  $\geq 50$  mL/min.
  - Hepatic function- ALT and bilirubin  $\leq 2$  times the institutional upper limit of normal

*Exclusion Criteria*

- Any use of immunomodulatory drugs such as azathioprine, mycophenolate, methotrexate, ciclosporin, cyclophosphamide within the 12 months prior to screening
- Any previous use of rituximab or alemtuzumab at any time
- Treatment with oral corticosteroids for greater than 2 weeks within the 12 months prior to screening, or any oral steroid use in 3 months prior to screening
- Regular use of NSAIDs including aspirin  $>75$ mg, naproxen, ibuprofen, meloxicam on more than 2 days per week
- Known inflammatory or autoimmune disease
- Chronic or latent infection
- Active infection requiring the use of parenteral antimicrobial agents within 2 months prior to the first dose of trial treatment
- Skin or solid organ malignancy within the 5 years prior to the screening assessment
- Current or previous haematological malignancy
- The inability to take or swallow oral medication
- Parkinson's Disease Dementia according to MDS PD Dementia criteria
- A positive test for HIV or Hepatitis
- TPMT deficiency
- A lack of immunity to VZV
- Negative EBV IgG
- Chronic liver disease
- Renal impairment - creatinine clearance  $<50$  mL/min
- Current or previous haematological malignancy
- Concomitant allopurinol
- Any concurrent medical or psychiatric condition or disease that is likely to interfere with the trial procedures or results, or that in the opinion of the investigator, would constitute a hazard for participating in this trial
- Receipt of live, attenuated vaccine within the 30 days prior to the screening assessment
- Women of childbearing potential. Female patients must be surgically sterile or be postmenopausal
- Male patients must be surgically sterile or must agree to use effective contraception during the period of therapy and for 6 months after the last dose of the trial treatment
- Known hypersensitivity to azathioprine or its excipient
- Received an investigational drug or used an invasive investigational medical device within 4 weeks before the screening assessment or is currently enrolled in an interventional investigational trial

1  
2  
3  
4  
5  
6  
7  
8  
9  
10  
11  
12  
13  
14  
15  
16  
17  
18  
19  
20  
21  
22  
23  
24  
25  
26  
27  
28  
29  
30  
31  
32  
33  
34  
35  
36  
37  
38  
39  
40  
41  
42  
43  
44  
45  
46  
47  
48  
49  
50  
51  
52  
53  
54  
55  
56  
57  
58  
59  
60





SPIRIT 2013 Checklist: Recommended items to address in a clinical trial protocol and related documents\*

| Section/item                      | Item No | Description                                                                                                                                                                                                                                                                                                                                         |
|-----------------------------------|---------|-----------------------------------------------------------------------------------------------------------------------------------------------------------------------------------------------------------------------------------------------------------------------------------------------------------------------------------------------------|
| <b>Administrative information</b> |         |                                                                                                                                                                                                                                                                                                                                                     |
| Title                             | 1       | Descriptive title identifying the study design, population, interventions, and, if applicable, trial acronym ✓                                                                                                                                                                                                                                      |
| Trial registration                | 2a      | Trial identifier and registry name. If not yet registered, name of intended registry ✓                                                                                                                                                                                                                                                              |
|                                   | 2b      | All items from the World Health Organization Trial Registration Data Set ✓                                                                                                                                                                                                                                                                          |
| Protocol version                  | 3       | Date and version identifier ✓                                                                                                                                                                                                                                                                                                                       |
| Funding                           | 4       | Sources and types of financial, material, and other support “funding statement” ✓                                                                                                                                                                                                                                                                   |
| Roles and responsibilities        | 5a      | Names, affiliations, and roles of protocol contributors “Authors’ contribution” ✓                                                                                                                                                                                                                                                                   |
|                                   | 5b      | Name and contact information for the trial sponsor “Sponsor contact” ✓                                                                                                                                                                                                                                                                              |
|                                   | 5c      | Role of study sponsor and funders, if any, in study design; collection, management, analysis, and interpretation of data; writing of the report; and the decision to submit the report for publication, including whether they will have ultimate authority over any of these activities “Trial monitoring and oversight” and “Funding statement” ✓ |
|                                   | 5d      | Composition, roles, and responsibilities of the coordinating centre, steering committee, endpoint adjudication committee, data management team, and other individuals or groups overseeing the trial, if applicable (see Item 21a for data monitoring committee) – safety monitoring and authors’ contributions ✓                                   |
| <b>Introduction</b>               |         |                                                                                                                                                                                                                                                                                                                                                     |
| Background and rationale          | 6a      | Description of research question and justification for undertaking the trial, including summary of relevant studies (published and unpublished) examining benefits and harms for each intervention – covered in the introduction ✓                                                                                                                  |

|    |                                                           |     |                                                                                                                                                                                                                                                                                                                                                                                                       |
|----|-----------------------------------------------------------|-----|-------------------------------------------------------------------------------------------------------------------------------------------------------------------------------------------------------------------------------------------------------------------------------------------------------------------------------------------------------------------------------------------------------|
| 1  |                                                           | 6b  | Explanation for choice of comparators – see last paragraph of introduction ✓                                                                                                                                                                                                                                                                                                                          |
| 2  |                                                           |     |                                                                                                                                                                                                                                                                                                                                                                                                       |
| 3  |                                                           |     |                                                                                                                                                                                                                                                                                                                                                                                                       |
| 4  | Objectives                                                | 7   | Specific objectives or hypotheses – in “trial overview” ✓                                                                                                                                                                                                                                                                                                                                             |
| 5  |                                                           |     |                                                                                                                                                                                                                                                                                                                                                                                                       |
| 6  | Trial design                                              | 8   | Description of trial design including type of trial (eg, parallel group, crossover, factorial, single group), allocation ratio, and framework (eg, superiority, equivalence, noninferiority, exploratory) – “trial overview” ✓                                                                                                                                                                        |
| 7  |                                                           |     |                                                                                                                                                                                                                                                                                                                                                                                                       |
| 8  |                                                           |     |                                                                                                                                                                                                                                                                                                                                                                                                       |
| 9  |                                                           |     |                                                                                                                                                                                                                                                                                                                                                                                                       |
| 10 |                                                           |     |                                                                                                                                                                                                                                                                                                                                                                                                       |
| 11 |                                                           |     |                                                                                                                                                                                                                                                                                                                                                                                                       |
| 12 | <b>Methods: Participants, interventions, and outcomes</b> |     |                                                                                                                                                                                                                                                                                                                                                                                                       |
| 13 |                                                           |     |                                                                                                                                                                                                                                                                                                                                                                                                       |
| 14 | Study setting                                             | 9   | Description of study settings (eg, community clinic, academic hospital) and list of countries where data will be collected. Reference to where list of study sites can be obtained – “Participant identification” ✓                                                                                                                                                                                   |
| 15 |                                                           |     |                                                                                                                                                                                                                                                                                                                                                                                                       |
| 16 |                                                           |     |                                                                                                                                                                                                                                                                                                                                                                                                       |
| 17 |                                                           |     |                                                                                                                                                                                                                                                                                                                                                                                                       |
| 18 | Eligibility criteria                                      | 10  | Inclusion and exclusion criteria for participants. If applicable, eligibility criteria for study centres and individuals who will perform the interventions (eg, surgeons, psychotherapists) “Inclusion criteria” and “exclusion criteria”. ✓                                                                                                                                                         |
| 19 |                                                           |     |                                                                                                                                                                                                                                                                                                                                                                                                       |
| 20 |                                                           |     |                                                                                                                                                                                                                                                                                                                                                                                                       |
| 21 |                                                           |     |                                                                                                                                                                                                                                                                                                                                                                                                       |
| 22 |                                                           |     |                                                                                                                                                                                                                                                                                                                                                                                                       |
| 23 | Interventions                                             | 11a | Interventions for each group with sufficient detail to allow replication, including how and when they will be administered – “trial procedures” ✓                                                                                                                                                                                                                                                     |
| 24 |                                                           |     |                                                                                                                                                                                                                                                                                                                                                                                                       |
| 25 |                                                           |     |                                                                                                                                                                                                                                                                                                                                                                                                       |
| 26 |                                                           |     |                                                                                                                                                                                                                                                                                                                                                                                                       |
| 27 |                                                           |     |                                                                                                                                                                                                                                                                                                                                                                                                       |
| 28 |                                                           | 11b | Criteria for discontinuing or modifying allocated interventions for a given trial participant (eg, drug dose change in response to harms, participant request, or improving/worsening disease) “Treatment allocation and safety monitoring” ✓                                                                                                                                                         |
| 29 |                                                           |     |                                                                                                                                                                                                                                                                                                                                                                                                       |
| 30 |                                                           |     |                                                                                                                                                                                                                                                                                                                                                                                                       |
| 31 |                                                           |     |                                                                                                                                                                                                                                                                                                                                                                                                       |
| 32 |                                                           |     |                                                                                                                                                                                                                                                                                                                                                                                                       |
| 33 |                                                           | 11c | Strategies to improve adherence to intervention protocols, and any procedures for monitoring adherence (eg, drug tablet return, laboratory tests) – “Treatment allocation and safety monitoring” ✓                                                                                                                                                                                                    |
| 34 |                                                           |     |                                                                                                                                                                                                                                                                                                                                                                                                       |
| 35 |                                                           |     |                                                                                                                                                                                                                                                                                                                                                                                                       |
| 36 |                                                           |     |                                                                                                                                                                                                                                                                                                                                                                                                       |
| 37 |                                                           | 11d | Relevant concomitant care and interventions that are permitted or prohibited during the trial See “overview” and exclusion criteria. ✓                                                                                                                                                                                                                                                                |
| 38 |                                                           |     |                                                                                                                                                                                                                                                                                                                                                                                                       |
| 39 |                                                           |     |                                                                                                                                                                                                                                                                                                                                                                                                       |
| 40 | Outcomes                                                  | 12  | Primary, secondary, and other outcomes, including the specific measurement variable (eg, systolic blood pressure), analysis metric (eg, change from baseline, final value, time to event), method of aggregation (eg, median, proportion), and time point for each outcome. Explanation of the clinical relevance of chosen efficacy and harm outcomes is strongly recommended – “outcome measures” ✓ |
| 41 |                                                           |     |                                                                                                                                                                                                                                                                                                                                                                                                       |
| 42 |                                                           |     |                                                                                                                                                                                                                                                                                                                                                                                                       |
| 43 |                                                           |     |                                                                                                                                                                                                                                                                                                                                                                                                       |
| 44 |                                                           |     |                                                                                                                                                                                                                                                                                                                                                                                                       |
| 45 |                                                           |     |                                                                                                                                                                                                                                                                                                                                                                                                       |
| 46 |                                                           |     |                                                                                                                                                                                                                                                                                                                                                                                                       |
| 47 |                                                           |     |                                                                                                                                                                                                                                                                                                                                                                                                       |
| 48 | Participant timeline                                      | 13  | Time schedule of enrolment, interventions (including any run-ins and washouts), assessments, and visits for participants. A schematic diagram is highly recommended (see Figure) Figure 1 and table 1 ✓                                                                                                                                                                                               |
| 49 |                                                           |     |                                                                                                                                                                                                                                                                                                                                                                                                       |
| 50 |                                                           |     |                                                                                                                                                                                                                                                                                                                                                                                                       |
| 51 |                                                           |     |                                                                                                                                                                                                                                                                                                                                                                                                       |
| 52 | Sample size                                               | 14  | Estimated number of participants needed to achieve study objectives and how it was determined, including clinical and statistical assumptions supporting any sample size calculations “sample size calculation” ✓                                                                                                                                                                                     |
| 53 |                                                           |     |                                                                                                                                                                                                                                                                                                                                                                                                       |
| 54 |                                                           |     |                                                                                                                                                                                                                                                                                                                                                                                                       |
| 55 |                                                           |     |                                                                                                                                                                                                                                                                                                                                                                                                       |
| 56 |                                                           |     |                                                                                                                                                                                                                                                                                                                                                                                                       |
| 57 |                                                           |     |                                                                                                                                                                                                                                                                                                                                                                                                       |
| 58 |                                                           |     |                                                                                                                                                                                                                                                                                                                                                                                                       |
| 59 |                                                           |     |                                                                                                                                                                                                                                                                                                                                                                                                       |
| 60 |                                                           |     |                                                                                                                                                                                                                                                                                                                                                                                                       |



1 Recruitment 15 Strategies for achieving adequate participant enrolment to reach  
2 target sample size “participant identification” ✓  
3

4 **Methods: Assignment of interventions (for controlled trials)**

5 Allocation:

6  
7  
8 Sequence 16a Method of generating the allocation sequence (eg, computer-  
9 generation generated random numbers), and list of any factors for stratification.  
10 To reduce predictability of a random sequence, details of any planned  
11 restriction (eg, blocking) should be provided in a separate document  
12 that is unavailable to those who enrol participants or assign  
13 interventions IMP, treatment allocation and safety monitoring ✓  
14

15  
16 Allocation 16b Mechanism of implementing the allocation sequence (eg, central  
17 concealment telephone; sequentially numbered, opaque, sealed envelopes),  
18 mechanism describing any steps to conceal the sequence until interventions are  
19 assigned Treatment allocation and safety monitoring ✓  
20

21 Implementation 16c Who will generate the allocation sequence, who will enrol participants,  
22 and who will assign participants to interventions Treatment allocation  
23 and safety monitoring ✓  
24

25 Blinding 17a Who will be blinded after assignment to interventions (eg, trial  
26 (masking) participants, care providers, outcome assessors, data analysts), and  
27 how Treatment allocation and safety monitoring ✓  
28

29 17b If blinded, circumstances under which unblinding is permissible, and  
30 procedure for revealing a participant’s allocated intervention during  
31 the trial Treatment allocation and safety monitoring ✓  
32  
33

34 **Methods: Data collection, management, and analysis**

35 Data collection 18a Plans for assessment and collection of outcome, baseline, and other  
36 methods trial data, including any related processes to promote data quality (eg,  
37 duplicate measurements, training of assessors) and a description of  
38 study instruments (eg, questionnaires, laboratory tests) along with  
39 their reliability and validity, if known. Reference to where data  
40 collection forms can be found, if not in the protocol “trial procedures”  
41 ✓  
42

43  
44 18b Plans to promote participant retention and complete follow-up,  
45 including list of any outcome data to be collected for participants who  
46 discontinue or deviate from intervention protocols Treatment allocation  
47 and safety monitoring ✓  
48  
49

50 Data 19 Plans for data entry, coding, security, and storage, including any  
51 management related processes to promote data quality (eg, double data entry;  
52 range checks for data values). Reference to where details of data  
53 management procedures can be found, if not in the protocol Data  
54 analysis ✓  
55  
56  
57  
58  
59  
60

- 1  
2  
3  
4  
5  
6  
7  
8  
9  
10  
11  
12
- |                     |     |                                                                                                                                                                                                        |
|---------------------|-----|--------------------------------------------------------------------------------------------------------------------------------------------------------------------------------------------------------|
| Statistical methods | 20a | Statistical methods for analysing primary and secondary outcomes. Reference to where other details of the statistical analysis plan can be found, if not in the protocol – <b>Data analysis</b> ✓      |
|                     | 20b | Methods for any additional analyses (eg, subgroup and adjusted analyses) <b>Data analysis</b> ✓                                                                                                        |
|                     | 20c | Definition of analysis population relating to protocol non-adherence (eg, as randomised analysis), and any statistical methods to handle missing data (eg, multiple imputation) <b>Data analysis</b> ✓ |

### 13 **Methods: Monitoring**

- 14  
15  
16  
17  
18  
19  
20  
21  
22  
23  
24  
25  
26  
27  
28  
29  
30  
31  
32  
33  
34  
35  
36  
37
- |                 |     |                                                                                                                                                                                                                                                                                                                                                                                                                |
|-----------------|-----|----------------------------------------------------------------------------------------------------------------------------------------------------------------------------------------------------------------------------------------------------------------------------------------------------------------------------------------------------------------------------------------------------------------|
| Data monitoring | 21a | Composition of data monitoring committee (DMC); summary of its role and reporting structure; statement of whether it is independent from the sponsor and competing interests; and reference to where further details about its charter can be found, if not in the protocol. Alternatively, an explanation of why a DMC is not needed. <b>Last paragraph of “Treatment allocation and safety monitoring”</b> ✓ |
|                 | 21b | Description of any interim analyses and stopping guidelines, including who will have access to these interim results and make the final decision to terminate the trial <b>Last paragraph of “Treatment allocation and safety monitoring”</b> ✓                                                                                                                                                                |
| Harms           | 22  | Plans for collecting, assessing, reporting, and managing solicited and spontaneously reported adverse events and other unintended effects of trial interventions or trial conduct- <b>Treatment allocation and safety monitoring</b> ✓                                                                                                                                                                         |
| Auditing        | 23  | Frequency and procedures for auditing trial conduct, if any, and whether the process will be independent from investigators and the sponsor <b>“Role of the Sponsor”</b> ✓                                                                                                                                                                                                                                     |

### 38 **Ethics and dissemination**

- 39  
40  
41  
42  
43  
44  
45  
46  
47  
48  
49  
50  
51  
52  
53  
54  
55  
56  
57  
58  
59  
60
- |                          |     |                                                                                                                                                                                                                                                                              |
|--------------------------|-----|------------------------------------------------------------------------------------------------------------------------------------------------------------------------------------------------------------------------------------------------------------------------------|
| Research ethics approval | 24  | Plans for seeking research ethics committee/institutional review board (REC/IRB) approval – <b>Ethics and dissemination</b> ✓                                                                                                                                                |
| Protocol amendments      | 25  | Plans for communicating important protocol modifications (eg, changes to eligibility criteria, outcomes, analyses) to relevant parties (eg, investigators, REC/IRBs, trial participants, trial registries, journals, regulators) – <b>“Trial monitoring and oversight”</b> ✓ |
| Consent or assent        | 26a | Who will obtain informed consent or assent from potential trial participants or authorised surrogates, and how (see Item 32) – <b>Participant identification</b> ✓                                                                                                           |
|                          | 26b | Additional consent provisions for collection and use of participant data and biological specimens in ancillary studies, if applicable <b>NA</b>                                                                                                                              |

|    |                               |     |                                                                                                                                                                                                                                                                                                                |
|----|-------------------------------|-----|----------------------------------------------------------------------------------------------------------------------------------------------------------------------------------------------------------------------------------------------------------------------------------------------------------------|
| 1  | Confidentiality               | 27  | How personal information about potential and enrolled participants will be collected, shared, and maintained in order to protect confidentiality before, during, and after the trial – Section “data analysis”- ✓                                                                                              |
| 2  |                               |     |                                                                                                                                                                                                                                                                                                                |
| 3  |                               |     |                                                                                                                                                                                                                                                                                                                |
| 4  |                               |     |                                                                                                                                                                                                                                                                                                                |
| 5  | Declaration of interests      | 28  | Financial and other competing interests for principal investigators for the overall trial and each study site -Competing interests statement✓                                                                                                                                                                  |
| 6  |                               |     |                                                                                                                                                                                                                                                                                                                |
| 7  |                               |     |                                                                                                                                                                                                                                                                                                                |
| 8  | Access to data                | 29  | Statement of who will have access to the final trial dataset, and disclosure of contractual agreements that limit such access for investigators Section “data analysis”- ✓                                                                                                                                     |
| 9  |                               |     |                                                                                                                                                                                                                                                                                                                |
| 10 |                               |     |                                                                                                                                                                                                                                                                                                                |
| 11 |                               |     |                                                                                                                                                                                                                                                                                                                |
| 12 | Ancillary and post-trial care | 30  | Provisions, if any, for ancillary and post-trial care, and for compensation to those who suffer harm from trial participation – Last paragraph of “treatment allocation, blinding and safety monitoring” ✓                                                                                                     |
| 13 |                               |     |                                                                                                                                                                                                                                                                                                                |
| 14 |                               |     |                                                                                                                                                                                                                                                                                                                |
| 15 |                               |     |                                                                                                                                                                                                                                                                                                                |
| 16 |                               |     |                                                                                                                                                                                                                                                                                                                |
| 17 | Dissemination policy          | 31a | Plans for investigators and sponsor to communicate trial results to participants, healthcare professionals, the public, and other relevant groups (eg, via publication, reporting in results databases, or other data sharing arrangements), including any publication restrictions Ethics and dissemination ✓ |
| 18 |                               |     |                                                                                                                                                                                                                                                                                                                |
| 19 |                               |     |                                                                                                                                                                                                                                                                                                                |
| 20 |                               |     |                                                                                                                                                                                                                                                                                                                |
| 21 |                               |     |                                                                                                                                                                                                                                                                                                                |
| 22 |                               |     |                                                                                                                                                                                                                                                                                                                |
| 23 |                               |     |                                                                                                                                                                                                                                                                                                                |
| 24 |                               | 31b | Authorship eligibility guidelines and any intended use of professional writers NA                                                                                                                                                                                                                              |
| 25 |                               |     |                                                                                                                                                                                                                                                                                                                |
| 26 |                               |     |                                                                                                                                                                                                                                                                                                                |
| 27 |                               | 31c | Plans, if any, for granting public access to the full protocol, participant-level dataset, and statistical code NA                                                                                                                                                                                             |
| 28 |                               |     |                                                                                                                                                                                                                                                                                                                |
| 29 |                               |     |                                                                                                                                                                                                                                                                                                                |
| 30 | <b>Appendices</b>             |     |                                                                                                                                                                                                                                                                                                                |
| 31 |                               |     |                                                                                                                                                                                                                                                                                                                |
| 32 | Informed consent materials    | 32  | Model consent form and other related documentation given to participants and authorised surrogates                                                                                                                                                                                                             |
| 33 |                               |     |                                                                                                                                                                                                                                                                                                                |
| 34 |                               |     |                                                                                                                                                                                                                                                                                                                |
| 35 | Biological specimens          | 33  | Plans for collection, laboratory evaluation, and storage of biological specimens for genetic or molecular analysis in the current trial and for future use in ancillary studies, if applicable                                                                                                                 |
| 36 |                               |     |                                                                                                                                                                                                                                                                                                                |
| 37 |                               |     |                                                                                                                                                                                                                                                                                                                |
| 38 |                               |     |                                                                                                                                                                                                                                                                                                                |

---

\*It is strongly recommended that this checklist be read in conjunction with the SPIRIT 2013 Explanation & Elaboration for important clarification on the items. Amendments to the protocol should be tracked and dated. The SPIRIT checklist is copyrighted by the SPIRIT Group under the Creative Commons “[Attribution-NonCommercial-NoDerivs 3.0 Unported](https://creativecommons.org/licenses/by-nc-nd/3.0/)” license.
